# Supplementary material for: Flu Shots Unveiled: A Global Systematic Review of Healthcare Providers’ Uptake of, Perceptions, and Attitudes toward Influenza Vaccination
Source: Vaccines (Basel). 2023 Nov 27;11(12):1760. doi: 10.3390/vaccines11121760 (PMC10747442; doi:10.3390/vaccines11121760)
Supplement: Supplementary file 1 [file vaccines-11-01760-s001.zip › Supplementary document S2 final + QA.xlsx]

## Sheet: Mega dbase
paper no.	Title	Journal	Authors	Published	Country	design	Sample size	Sample type	Quality assessment tool	Q.A score	no. of Physicians	no. of nurses	no. of others
1	Attitudes, beliefs and practice of Egyptian healthcare workers towards seasonal influenza vaccination.	Influenza and Other Respiratory Viruses	Hakim SA; ; Amin W; Allam MF; Fathy AM; Mohsen A	2021	Egypt	Cross-sectional	3534	Physicians and nurses	1	8	1745	1789	0
2	Exploring vaccination coverage and attitudes of health care workers towards influenza vaccine in Cyprus.	Vaccine	Papageorgiou C; ; Mazeri S; Karaiskakis M; Constantinou D; Nikolaides C; Katsouris S; Patsalou M; Kourouzidou D; Pantelas G; Koliou M	2022	Cyprus	nation-wide survey	962	HCWs	1	7	190	538	207
3	Vaccination against influenza among Lebanese health care workers in the era of coronavirus disease 2019.	BMC Public Health	Youssef D; ; Berry A; Youssef J; Abou-Abbas L	2022	Lebanon	cross-sectional	560	Physician, Lab specialist, Pharmacist, Nurse	1	8	81	354	125
4	Vaccination attitudes, beliefs and behaviours among primary health care workers in northern Croatia.	Vaccine	Tomljenovic M; ; Petrovic G; Antoljak N; Hansen L	2021	Croatia	cross-sectional	324	physicians and nurses	1	8	143	181	0
5	Attitudes and beliefs of healthcare workers about influenza vaccination.	Nursing older people	Halpin C; ; Reid B	2019	Ireland	self-administered questionnaire	35	HCWs	1	5	0	9	26
6	Cluster Analysis: Vaccination Attitudes and Beliefs of Healthcare Personnel.	American journal of health behavior	Bardenheier BH; ; Lindley MC; Ball SW; de Perio MA; Laney S; Gravenstein S	2020	USA	cross-sectional	2265	HCWs	1	4	not specified	not specified	2265
7	Influenza Vaccination Coverage, Motivators for, and Barriers to Influenza Vaccination among Healthcare Workers in Wroclaw, Poland.	International Journal of Environmental Research and Public Health	JÄ™drzejek MJ; ; Mastalerz-Migas A	2022	Poland	cross-sectional	165	HCWs	1	4	92	43	30
8	Vaccine hesitancy and self-vaccination behaviors among nurses in southeastern France.	Vaccine	Wilson R; ; Zaytseva A; Bocquier A; Nokri A; Fressard L; Chamboredon P; Carbonaro C; Bernardi S; DubÃ© E; Verger P	2020	France	cross-sectional	1539	nurses	1	8	0	1539	0
9	Influenza vaccination rates, knowledge, attitudes and behaviours of healthcare workers in Turkey: A multicentre study.	THE INTERNATIONAL JOURNAL OF CLINICAL PRACTICE	Korkmaz N; ; Nazik S; GÃ¼mÃ¼ÅŸtakÄ±m RÅž; Uzar H; Kul G; Tosun S; Torun A; Demirbakan H; Seremet Keskin A; KaÃ§maz AB; Erdem HA; Uysal S; Aliravci ID; YeÅŸilyurt ÅžÃ¶len E; Can H; Deniz M; Demiray GÃ¼rbÃ¼z E; KostakoÄŸlu U; BÃ¶lÃ¼kbaÅŸÄ± H	2021	Turkey and Turkish Republic of Northern Cyprus	cross-sectional	12475	HCWs	1	3	1937	4011	6527
10	Seasonal influenza self-vaccination behaviours and attitudes among nurses in Southeastern France.	Human Vaccines & Immunotherapeutics	Wilson R; ; Scronias D; Zaytseva A; Ferry MA; Chamboredon P; DubÃ© E; Verger P	2019	France	cross-sectional	1539	nurses	1	7	0	1539	0
11	Knowledge and healthcare professionals' perceptions of influenza vaccination in the Qassim region, Saudi Arabia (2019-2020).	HUMAN VACCINES & IMMUNOTHERAPEUTICS	Alharbi N; ; Almutiri A; Alotaibi F; Ismail A	2021	Saudi Arabia	cross-sectional	327	HCWs	1	7	97	90	140
12	Demand and motivation for influenza vaccination among healthcare workers before and during the COVID-19 era: a cross-sectional survey.	HUMAN VACCINES & IMMUNOTHERAPEUTICS	Å tÄ›pÃ¡nek L; ; NaklÃ¡dalovÃ¡ M; VildovÃ¡ H; BorikovÃ¡ A; JanoÅ¡Ã­kovÃ¡ M; IvanovÃ¡ K	2021	Czech Republic	cross-sectional	603	HCWs	1	7	289	0	314
13	Seasonal influenza vaccination among primary health care workers in Southwestern Saudi Arabia.	HUMAN VACCINES & IMMUNOTHERAPEUTICS	Awadalla NJ; ; Al-Musa HM; Al-Musa KM; Asiri AM; Albariqi AA; Majrashi HM; Alasim AA; Almuslah AS; Alshehri TK; AlFlan MA; Mahfouz AA	2020	Saudi Arabia	cross-sectional	312	primary healthcare workers (PHCWs)	1	8	123	68	121
14	Factors associated with influenza vaccination acceptance in Mexican healthcare workers: A multicenter cross-sectional study.	Preventive Medicine	Ochoa-Hein E; ; GutiÃ©rrez-LÃ³pez EN; Torres-Erazo DS; NÃºÃ±ez-Caamal NJ; MartÃ­nez-Longoria CA; GarcÃ­a-Bonilla LA; Rivera-FernÃ¡ndez GalÃ¡n B; Monroy-ColÃ­n VA; Prado-GonzÃ¡lez TJ; Vilar-Compte D; Huertas-JimÃ©nez MA; ChÃ¡vez-RÃ­os AR; Haro-Osnaya A; ColÃ­n-GonzÃ¡lez KK; de Paz-GarcÃ­a R; VÃ¡zquez-Andrade A; Romero-Oliveros C; Galindo-Fraga A	2021	Mexico	cross-sectional	1513	HCWs	1	8	359	411	743
15	Attitudes of Nursing Home Staff Towards Influenza Vaccination: Opinions and Factors Influencing Hesitancy.	International Journal of Environmental Research and Public Health	Moretti F; ; Visentin D; Bovolenta E; Rimondini M; Majori S; Mazzi M; Poli A; Tardivo S; Torri E	2020	Italy	cross-sectional	166	Nursing Home Staff	1	8	0	166	0
16	Seasonal influenza vaccination among Chinese health care workers.	American Journal of Infection Control	Lee PH; ; Cowling BJ; Yang L	2017	China	cross-sectional / Brief Report	393	173 doctors and 220 nurses	1	8	173	220	0
17	Barriers and facilitators to seasonal influenza vaccination uptake among nurses: A mixed methods study.	The Journal of Advanced Nursing	Flanagan P; ; Dowling M; Gethin G	2020	Ireland	mixed methods study	462	nurses	3	8	0	462	0
18	Acceptability of seasonal influenza vaccines among health care workers in Vietnam in 2017.	Vaccine	Nguyen TTM; ; Lafond KE; Nguyen TX; Tran PD; Nguyen HM; Ha VTC; Do TT; Ha NT; Seward JF; McFarland JW	2020	Vietnam	cross-sectional	1450	HCWs	1	6	233	603	614
19	Intention of nurses to receiving influenza vaccination before the 2013-14 season.	HUMAN VACCINES & IMMUNOTHERAPEUTICS	Wang To K; ; Lee S; Lee SS	2015	Hong Kong	cross-sectional	1934	nurses	1	6	0	1934	0
20	Knowledge, attitudes and uptake related to influenza vaccine among healthcare workers during the 2018-2019 influenza season in Tunisia.	BMC Public Health	Cherif I; ; Kharroubi G; Bouabid L; Gharbi A; Boukthir A; Ben Alaya N; Ben Salah A; Bettaieb J	2021	Tunisia	cross-sectional	1231	HCWs	1	8	182	not specified	1049
21	Influenza vaccination rates and beliefs about vaccination among nursing home employees.	American Journal of Infection Control	Daugherty JD; ; Blake SC; Grosholz JM; Omer SB; Polivka-West L; Howard DH	2015	USA	cross-sectional	1965	Nursing home employees	1	5	0	1434	531
22	Nursing knowledge, attitude, and practice to influenza vaccination at suburban hospital in West Java, Indonesia.	Journal of preventive medicine and hygiene	Ramadhani BP; ; Soeroto AY; Suryadinata H; Rakhmilla LE	2020	Indonesia	cross-sectional	104	nurses	1	6	0	104	0
23	Nurses' attitudes towards enforced measures to increase influenza vaccination: A qualitative study.	Influenza and other respiratory viruses	Pless A; ; Shaw D; McLennan S; Elger BS	2017	Switzerland	Semi-structured qualitative	18	non- vaccinated nurses	3	10	0	18	0
24	Knowledge, attitudes and practices related to influenza and influenza vaccine among healthcare workers in Chongqing, China-a cross-sectional study.	HUMAN VACCINES & IMMUNOTHERAPEUTICS	Luo Q; ; Gan L; Xiong Y; Li Q; Chen T; Tang X	2021	China	cross-sectional	1412	HCWs	1	8	457	741	214
25	Barriers and beliefs among health-care workers regarding seasonal influenza vaccine in Al-Qassim region, Saudi Arabia.	Human Vaccines & Immunotherapeutics	Alsuhaibani M;	2020	Saudi Arabia	cross-sectional	523	HCWs	1	8	148	235	140
26	Influenza Vaccination Rate and Factors Associated With Compliance Among Health Care Employees in Large and Medium Acute Care Hospitals.	the official journal of the American College of Medical Quality	Gafner M; ; Korlander H; Zimlichman R; Ziv-Baran T; Zimlichman E	2021	Israel	cross-sectional	339	HCWs	1	6	140	199	0
27	Determinants of change in intention to receive influenza vaccination among health-care workers in Singapore.	HUMAN VACCINES & IMMUNOTHERAPEUTICS	Lim DW; ; Ho HJ; Lee LT; Chow A; Kyaw WM	2020	Singapore	cross-sectional	3007	HCWs	1	7	not specified	1614	not specified
28	Beliefs, attitudes, and activities of healthcare personnel about influenza and pneumococcal vaccines.	HUMAN VACCINES & IMMUNOTHERAPEUTICS	Ã‡iftci F; ; Åžen E; Demir N; Ã‡iftci O; Erol S; Kayacan O	2018	Turkey	questionnaire forms	470	85 (18.1%) physicians, 134 (28.5%) nurses, 53 (11.3%) healthcare assistants,, 44 (9.4%) paramedics, 47 (10%) medical secretaries, and 107 (22.8%) auxiliary staff members	1	6	85	134	251
29	Factors affecting uptake of influenza vaccination among family physicians.	Elsevier	Akan H; ; Yavuz E; Yayla ME; KÃ¼lbay H; Kaspar EÃ‡; ZahmacÄ±oÄŸlu O; Badur S	2016	Turkey	cross-sectional study	606	343 men and 281 women, 25 responses did not indicate a gender	1	6	606	0	0
30	Skepticism toward Emerging Infectious Diseases and Influenza Vaccination Intentions in Nurses.	Journal of Health Communication	Maridor M; ; Ruch S; Bangerter A; Emery V	2017	Switzerland	cross-sectional questionnaire	293	Nurses, 231 female and 62 male	1	5	0	293	0
31	Influenza Vaccination Coverage Rate for Medical Staff: Influence of Hospital-Based Vaccination Campaign.	Springer International Publishing Switzerland 2015	Zielonka TM; ; SzymaÅ„czak M; Jakubiak J; Nitsch-Osuch A; Å»yciÅ„ska K	2016	Poland,	questionnaire	215		1	5	150	241	371
32	Nurses' experiences of the seasonal influenza vaccine in residential care.	British Journal of Nursing	Quinn G;	2014	Ireland	qualitative study with semi-structured interviews, interpretative or ‘hermeneutic’ approach.	11	All participants were female nurses	3	8	0	11	0
33	Reasons for the low influenza vaccination rate among nurses in Slovenia.	Primary Health Care Research & Development	PavliÄ DR; ; Maksuti A; Podnar B; Kokalj Kokot M	2020	Slovenia	qualitative study using qualitative content analysis.	19	registered nurse, not vaccinated against influenza with written permission from the Head of the Department. The sample contained female and male, older and younger and from rural and urban areas	3	8	0	19	0
34	Understanding health care personnel's attitudes toward mandatory influenza vaccination.	American Journal of Infection Control	Awali RA; ; Samuel PS; Marwaha B; Ahmad N; Gupta P; Kumar V; Ellsworth J; Flanagan E; Upfal M; Russell J; Kaplan C; Kaye KS; Chopra T	2014	USA	Web-based questionnaire	3054	aged 36-65 years (75%), non-Hispanic white (66%), female (86%), working as a nurse (33%), and at the current job for >10 years (51%).	1	4	61	1008	1985
35	Influenza Vaccination Coverage Rates, Knowledge, Attitudes, and Beliefs in Jordan: A Comprehensive Study.	VIRAL IMMUNOLOGY	Assaf AM; ; Hammad EA; Haddadin RN	2016	Jordan	cross-sectional	522		1	7	not specified	not specified	not specified
36	Knowledge, attitude and awareness among healthcare professionals about influenza vaccination in Peshawar, Pakistan.	Elsevier-vaccine	Khan TM; ; Khan AU; Ali I; Wu DB	2016	Pakistan	A cross-sectional study	165	majority were male 106 (64.2%), majority were physicians 77 (46.7%), followed by pharmacists and nurses	1	6	77	49	39
37	Nurses' vaccination against pandemic H1N1 influenza and their knowledge and other factors.	Elsevier-vaccine	Zhang J; ; While AE; Norman IJ	2012	UK	selfadministered questionnaire	522	Nurses only.	1	5	0	522	0
38	Influenza vaccination among Malaysian healthcare workers: a survey of coverage and attitudes.	Med J Malaysia	Hudu SA; ; Harmal NS; Malina O; Sekawi Z	2016	Malaysia	cross-sectional questionnaire	527	420 (79.7%) were female.	1	5	not specified	not specified	not specified
39	Attitudes of health care workers to influenza vaccination: why are they not vaccinated?	American Journal of Infection Control	Takayanagi IJ; ; Cardoso MR; Costa SF; Araya ME; Machado CM	2007	Brazil	epidemiologic survey after a campaign	258	bone marrow transplant outpatient unit (n 5 11), nursery (n 5 70), dialysis (n 5 41), geriatrics (n 5 19), hematology/bone marrow transplant (n 5 52), infectious diseases (n 5 62), nephrology (n 5 11), liver transplant (n 5 43), intensive care unit (n 5 46), and kidney transplant unit (n 5 23).	5	6
40	Factors effecting influenza vaccination uptake among health care workers: a multi-center cross-sectional study.	BMC Infectious Diseases	Asma S; ; Akan H; Uysal Y; PoÃ§an AG; SucaklÄ± MH; Yengil E; GereklioÄŸlu Ã‡; Korur A; BaÅŸhan Ä°; Erdogan AF; Ã–zÅŸahin AK; Kut A	2016	Turkey	a multi-centre cross-sectional	642	177 (28.2 %) were physicians and 448 (71.3 %) were nurses, 406 (64.6 %) were female and 218 (34.7 %) were male.	1	7	177	448	17
41	Influenza vaccination among infection control teams: A EUCIC survey prior to COVID-19 pandemic.	Vaccine	Keske Åž; ; Mutters NT; Tsioutis C; ErgÃ¶nÃ¼l Ã–	2020	56 countries. A multilingual (translated in English, German, Turkish, French, Croatian, Dutch, Greek, Italian, Romanian, Spanish, Russian) and multinational survey was performed.	survey	899	67.6% (n = 607) were female. The majority of the participants were physicians (69%), followed by nurses (26%). Most (281 out of 883) survey respondents reported to work in a state university hospital, 252 in a state hospital, 136 in a state research and training hospital, and 91 in a private hospital	1	6	620	234	45
42	Intention to receive the seasonal influenza vaccine among nurses working in a long-term care facility.	International Journal of Nursing Practice	Shahar I; ; Mendelson G; Ben Natan M	2017	Israel	questionnaire	150	More than half the respondents were women (n = 114 and 76%), 80.7% were Jews (n = 121).	1	6	0	150	0
43	Influenza vaccination 2014-2015: Results of a survey conducted among general practitioners in Italy.	Human Vaccines & Immunotherapeutics	Levi M; ; Bonanni P; Biffino M; Conversano M; Corongiu M; Morato P; Maio T	2018	Italy	questionnaire	1245		1	8	1245	0	0
44	Determinants of influenza vaccination among healthcare workers.	infection control and hospital epidemiology	Godin G; ; VÃ©zina-Im LA; Naccache H	2010	Canada	Prospective survey with 2-month follow-up	424	(nurses, auxiliary staff members, and technical staff members)	1	8	0	not specified	not specified
45	Influenza vaccination acceptance and refusal rates among health care personnel.	Southern Medical Journal	Millner VS; ; Eichold BH 2nd; Franks RD; Johnson GD	2010	USA	self-administered surveys	282		1	8	not specified	not specified	not specified
46	Knowledge and attitude of Kenyan healthcare workers towards pandemic influenza disease and vaccination: 9Â years after the last influenza pandemic.	Vaccine	Andayi F; ; Emukule GO; Osoro E; Ndegwa LK; Otiato F; Muturi P; Azziz-Baumgartner E; Kalani R; Anyango E; Muthoka PM; Ebama MS; Bresee J; Chaves SS	2021	Kenya	cross-sectional, self-administered, written survey	2035	1,307 (64.2%) were female, 1,234 (60.9%) were	1	8	127	1008	881
47	Seasonal influenza vaccine compliance among hospital-based and nonhospital-based healthcare workers.	infection control and hospital epidemiology	Rebmann T; ; Wright KS; Anthony J; Knaup RC; Peters EB	2012	USA	survey	3188	majority of respondents were female (81.3%, ); n p 2,538 white (86.4%, ); nurses or nurse practitioners n p 2,701 (43.8%, ), physicians or physician assistants (9.1%, n p 1,370 n p 285), or nonlicensed workers (15.1%, ); and n p 472 had a bachelor’s degree or less education (66.6%, n p 2,183). About half reported that they work at a hospital at least 25% of the time (46.2%, ). nonhospital workers…	1	8	285	1370	1533
48	Health workers' attitudes, perceptions and knowledge of influenza immunization in Lima, Peru: A mixed methods study.	Vaccine	BazÃ¡n M; ; Villacorta E; Barbagelatta G; Jimenez MM; Goya C; Bartolini RM; Penny ME	2017	Peru	Qualitative interviews informed the development of a survey instrument that consisted of open and close-ended questions.	672		3	8
49	Improving Mandatory Vaccination Against Influenza: Minimizing Anxiety of Employees to Maximize Health of Patients.	American Journal of Medical Quality	Benin AL; ; Lockwood G; Creatore T; Donovan D; Predmore M; MacArthur S	2018	USA	qualitative methods based on openended interviews	21		3	9			21
50	Predictors of influenza vaccination among emergency medical services personnel.	PREHOSPITAL EMERGENCY CARE	Hubble MW; ; Zontek TL; Richards ME	2011	USA	cross-sectional survey	601	emergency medical services professionals	1	7	not specified	not specified	not specified
51	Health care professionals' awareness of, knowledge about and attitude to influenza vaccination.	Vaccine	Alshammari TM; ; AlFehaid LS; AlFraih JK; Aljadhey HS	2014	Saudi Arabia	A cross-sectional	242	(physicians: 31%, pharmacists: 32.41%,nurses: 32%)	1	7	76	79	87
52	Influenza vaccination amongst hospital health care workers in Beijing.	Occupational Medicine-Oxford University Press	Seale H; ; Wang Q; Yang P; Dwyer DE; Wang X; Zhang Y; MacIntyre CR	2010	China	survey	1909	nursing (60%, n 5 1143), medical (36%, n 5 693) and other (4%, n 5 73).	1	7	693	1143	73
53	Attitudes of Hospital Healthcare Workers towards Influenza Vaccination in a Tertiary Hospital Setting.	Irish Medical Journal	Muhammad HS; ; Gueret P; Hayes B	2015	Ireland	questionnaires	119		1	2	not specified	not specified	not specified
54	Influenza vaccination compliance among health care workers in a German university hospital.	Infection	Wicker S; ; Rabenau HF; Doerr HW; Allwinn R	2009	Germany	questionnaires	1100		1	5	282	256	562
55	Improving influenza vaccination uptake among healthcare workers by on-site influenza vaccination campaign in a tertiary children hospital.	Human Vaccines & Immunotherapeutics	Oguz MM;	2019	Turkey	pre-post single-group intervention that implemented and evaluated onsite vaccination intervention program in one observation season. The 2016-17 season was used as a control group	572	212 (37.1%) physicians, 196 (34.3%) nurses/midwives/paramedics and 164 (28.7%) nonclinical support staff	5	7	212	196	164
56	Knowledge, attitudes and beliefs regarding influenza vaccination among healthcare workers in a Saudi hospital.	Vaccine	Rehmani R; ; Memon JI	2010	Saudi Arabia	cross-sectional	512		1	8	159	319	34
57	Knowledge, attitudes and anxiety towards influenza A/H1N1 vaccination of healthcare workers in Turkey.	BMC Infect Dis	Savas E; ; Tanriverdi D	2010	Turkey	questionnaire	300	doctors (98), nurses (101) and allied health professionals (101	1	8	98	101	101
58	Seasonal influenza vaccination coverage among local health department personnel in North Carolina, 2007-2008.	American Journal of Preventive Medicine	Kent JN; ; Lea CS; Fang X; Novick LF; Morgan J	2010	USA	cross-sectional survey	1209		1	5	not specified	314	not specified
59	Association between health care workers' knowledge of influenza vaccine and vaccine uptake. medical students involved	American Journal of Infection Control	Jaiyeoba O; ; Villers M; Soper DE; Korte J; Salgado CD	2014	USA	cross-sectional, self-administered survey	689	14% of respondents were medical students, 15% were physicians (15% at the attending level), and 71% were nursing staff (93% registered nurses).	1	3	103	489	103
60	Pattern of exposure to information and its impact on seasonal influenza vaccination uptake in nurses.	J Hosp Infect.	Cheung EKH; ; Lee S; Lee SS	2017	China	questionnaire	1526	Nurses , Most of the respondents were female (n=1012, 86%)	1	7	0	1526	0
61	External cues to action and influenza vaccination among post-graduate trainee physicians in Toronto, Canada.	Vaccine	Nowrouzi-Kia B; ; McGeer A	2014	Canada	Cross-sectional	963	trainee physicians	1	8	963	0	0
62	Seasonal influenza vaccination predicts pandemic H1N1 vaccination uptake among healthcare workers in three countries.	Vaccine	Chor JS; ; Pada SK; Stephenson I; Goggins WB; Tambyah PA; Clarke TW; Medina M; Lee N; Leung TF; Ngai KL; Law SK; Rainer TH; Griffiths S; Chan PK	2011	Hong Kong (HK), Singapore (SG) and Leicester, United Kingdom (UK)	Cross-sectional	2100	HCWs	1	8	not specified	not specified	not specified
63	Attitudes of nurses in Greece towards influenza vaccination.	Art and Science	Raftopoulos V;	2008	Greece	Qualitative (focus group discussions (FGDs))	30	Nurses	3	8	0	30	0
64	Knowledge of and attitudes to influenza vaccination in healthy primary healthcare workers in Spain, 2011-2012.	PLOS ONE	DomÃ­nguez A; ; Godoy P; Castilla J; Soldevila N; Toledo D; Astray J; Mayoral JM; Tamames S; GarcÃ­a-GutiÃ©rrez S; GonzÃ¡lez-Candelas F; MartÃ­n V; DÃ­az J; Torner N	2013	Spain	Cross-sectional	1749	PHC worker providing direct patient care (family physicians, paediatricians and nurses).	1	7	995	754	0
65	Behavior of nurses and nurse aides toward influenza vaccine: the impact of the perception of occupational working conditions.	HUMAN VACCINES & IMMUNOTHERAPEUTICS	Mignot A; ; Wilhelm MC; Valette A; Gavard-Perret ML; Abord-De-Chatillon E; Epaulard O	2020	France	Cross-sectional	791	Nurses and nurses aides	1	8	0	791	0
66	Resistance to vaccination: the attitudes and practices of primary healthcare workers confronting the H1N1 pandemic.	Vaccine	Hidiroglu S; ; Ay P; Topuzoglu A; Kalafat C; Karavus M	2010	Turkey	Qualitative (focus group discussions (FGDs))	33	general practitioners, nurses, midwives and sanitary servants.	3	6	17
67	Physician attitudes towards influenza immunization and vaccine mandates.	Vaccine	deSante JE; ; Caplan A; Shofer F; Behrman AJ	2010	USA	Cross-sectional	227	House officers and attending physicians in the Emergency Medicine (EM) and Internal Medicine (IM) departments	1	7	227	0	0
68	Randomized trial of a program to increase staff influenza vaccination in primary care clinics.	Annals of Family Medicine	Abramson ZH; ; Avni O; Levi O; Miskin IN	2010	Jerusalem	Intervention	344	direct patient contact (physicians, nurses, pharmacists, and administrative and ancillary staff)	5	9	121	68	155
69	Attitudes amongst Australian hospital healthcare workers towards seasonal influenza and vaccination.	Influenza and Other Respiratory Viruses	Seale H; ; Leask J; MacIntyre CR	2010	Australia	Cross-sectional	1079	HCWs	1	7	281	512	286
70	Influenza immunization of Dutch general practitioners: vaccination rate and attitudes towards vaccination.	Vaccine	Opstelten W; ; van Essen GA; Ballieux MJ; Goudswaard AN	2008	Netherlands	Cross-sectional	698	GPs	1	7	698	0	0
71	Knowledge, attitude, and practices about the seasonal influenza vaccination among healthcare workers in Srinagar, India.	Influenza and other respiratory viruses	Bali NK; ; Ashraf M; Ahmad F; Khan UH; Widdowson MA; Lal RB; Koul PA	2013	India	Cross-sectional	1421	HCWs	1	7	764	478	179
72	Influenza vaccination status and influenza-related perspectives and practices among US physicians.	American Journal of Infection Control	Cowan AE; ; Winston CA; Davis MM; Wortley PM; Clark SJ	2006	USA	Cross-sectional	688	Physicians	1	8	688	0	0
73	Factorial design for improving influenza vaccination among employees of a large health system.	Infection Control and Hospital Epidemiology	Zimmerman RK; ; Nowalk MP; Lin CJ; Raymund M; Fox DE; Harper JD; Tanis MD; Willis BC	2009	USA	Intervention	26435		5	9	not specified	not specified	not specified
74	Attitudes toward and uptake of H1N1 vaccine among health care workers during the 2009 H1N1 pandemic.	PLOS One	Henriksen Hellyer JM; ; DeVries AS; Jenkins SM; Lackore KA; James KM; Ziegenfuss JY; Poland GA; Tilburt JC	2011	USA	Cross-sectional	1073	Physicians and Nurses	1	7	476	587	0
75	Influenza vaccination in paediatric nurses: cross-sectional study of coverage, refusal, and factors in acceptance.	Vaccine	Norton SP; ; Scheifele DW; Bettinger JA; West RM	2008	Canada	Cross-sectional	585	Nurses	1	8	0	585	0
76	Acceptance of the 2009 A(H1N1) influenza vaccine among hospital workers in two French cancer centers.	Vaccine	BarriÃ¨re J; ; Vanjak D; Kriegel I; Otto J; Peyrade F; EstÃ¨ve M; Chamorey E	2010	France	Cross-sectional	506	HCWs	1	8	41	138	327
77	Trends in influenza vaccine coverage among primary healthcare workers in Spain, 2008-2011.	Preventive Medicine	Castilla J; ; MartÃ­nez-Baz I; Godoy P; Toledo D; Astray J; GarcÃ­a S; Mayoral JM; MartÃ­n V; GonzÃ¡lez-Candelas F; Guevara M; Diaz-Borrego J; Torner N; Baricot M; Tamames S; DomÃ­nguez A	2013	Spaine	Cross-sectional	1965	Primary HCWs (GPs, pediatricians, and nurses)	1	8	1126	839	0
78	Seasonal influenza vaccination knowledge, risk perception, health beliefs and vaccination behaviours of nurses.	Epidemiology and Infection	Zhang J; ; While AE; Norman IJ	2012	UK	Cross-sectional	522	Nurses	1	7	0	522	0
79	Increasing healthcare workers' uptake of seasonal influenza vaccination in a tertiary-care pediatric hospital in Greece with a low-cost, tailor-made, multifaceted strategy.	Vaccine	Kopsidas I; ; Tsopela GC; Maroudi-Manta S; Kourkouni E; Charalampopoulos D; Sirogianni A; Collins ME; Lourida A; Kourlaba G; Zaoutis TE; Coffin SE	2020	Greece	Cross-sectional	363	HCWs	1	8	106	145	112
80	Barriers to influenza vaccine acceptance. A survey of physicians and nurses.	American Journal of Infection Control	Weingarten S; ; Riedinger M; Bolton LB; Miles P; Ault M	1989	USA	Cross-sectional	193	HCWs	1	7	85	108	0
81	Predicting seasonal influenza vaccination among hospital-based nurses.	Clinical Nursing Research	Marentette T; ; El-Masri MM	2011	Canada	Cross-sectional	202	Nurses	1	7	0	202	0
82	Policies and practices for improving influenza immunization rates among healthcare workers.	Infection Control and Hospital Epidemiology	Goldstein AO; ; Kincade JE; Gamble G; Bearman RS	2004	USA	Cross-sectional	268 institutions (the only data that is related to our review is represnted by the % (not the #) of employees from each organization who agree with specific barriers to vaccination)		1	5	not specified	not specified	not specified
83	Why are influenza vaccination coverage rates still too low among health care workers in a tertiary care children's hospital in Turkey?	Journal of Public Health Policy	Ertugrul A; ; Sari E; Gulenc N; Ozmen S	2021	Turkey	Cross-sectional	108	HCWs	1	6	41	33	34
84	Influenza vaccination among healthcare workers in a university children's hospital.	Infection Control and Hospital Epidemiology	Tapiainen T; ; BÃ¤r G; Schaad UB; Heininger U	2005	Switzerland	Cross-sectional	406	HCWs	1	8	63	249	90
85	Health care worker beliefs about influenza vaccine and reasons for non-vaccination--a cross-sectional survey.	Journal of Clinical Nursing	Canning HS; ; Phillips J; Allsup S	2005	UK	Cross-sectional	144	Nursing	1	6	0	0	144
86	Healthcare workers and H1N1 vaccination: does having a chronic disease make a difference?	Vaccine	Toh MP; ; Kannan P; Chen Y; Chng FL; Tang WE	2012	Singapore	Cross-sectional	711	HCWs	1	8	104	183	424
87	Knowledge of and Attitudes to Influenza Vaccination among Community Pharmacists in Catalonia (Spain). 2013-2014 Season: A Cross Sectional Study.	Environmental Research and Public Health	Toledo D; ; Soldevila N; Guayta-Escolies R; Lozano P; Rius P; GascÃ³n P; DomÃ­nguez A	2017	Spaine	Cross-sectional	463	Pharmacists	1	8	0	0	463
88	Effect of a hospital campaign for influenza vaccination of healthcare workers.	Infection Control and Hospital Epidemiology	Song JY; ; Park CW; Jeong HW; Cheong HJ; Kim WJ; Kim SR	2006	Korea	Cross-sectional	1131	HCWs	1	7	291-329	424-474	275-295
89	Acceptability of IntanzaÂ® 15 Î¼g intradermal influenza vaccine in Belgium during the 2010-2011 influenza season.	Advanced in Therapy	Dhont PA; ; Albert A; Brenders P; Podwapinska A; Pollet A; Scheveneels D; Tihon F; Verheyden I; Victor J; Samson SI	2012	Belgium	Cross-sectional	105	GPs	1	8	105	0	0
90	Factors affecting influenza vaccine uptake among health care workers.	Vaccines MDPI	O'Reilly FW; ; Cran GW; Stevens AB	2005	Bangladesh	Cross-sectional	2046	HCWs	1	7		203
91	Attitudes and perceptions of influenza vaccination among Hong Kong doctors and medical students before the 2009 pandemic.	Europian Journal of Public Health	Mak KK; ; Yiu YF; Ko KL; Hui KS; Mak KM; Mak LY; To WP; Wu KH; Yeung F; Lee PP	2013	Hong Kong	Cross-sectional	204		1	7	204	0	0
92	Exploring determinants of acceptance of the pandemic influenza A (H1N1) 2009 vaccination in nurses.	American Journal of Infection Control	To KW; ; Lee S; Chan TO; Lee SS	2010	China	Crossa-sectional	812	Nurses	1	7	0	812	0
93	Qualitative motivators and barriers to pandemic vs. seasonal influenza vaccination among healthcare workers: a content analysis.	Vaccine	Prematunge C; ; Corace K; McCarthy A; Nair RC; Roth V; Suh KN; Garber G	2014	Canada	Qualitative (using a survey)	3301		1	8	172	1153	1976
94	Influenza immunisation of doctors at an Australian tertiary hospital: immunisation rate and factors contributing to uptake.	Communicable diseases intelligence	Kaufman J; ; Davis J; Krause V	2008	AUSTRALIA	Crossa-sectional	150	doctors	1	7	150	0	0
95	Use of a mobile cart influenza program for vaccination of hospital employees.	Infection control and hospital epidemiology	Sartor C; ; Tissot-Dupont H; Zandotti C; Martin F; Roques P; Drancourt M	2004	France	intervention	3636	HCWs	4	11	157, 177, 219	339, 364, 343	628, 727, 682
96	Increased vaccine uptake and less perceived barriers toward vaccination in long-term care facilities that use multi-intervention manual for influenza campaigns.	Human Vaccines & Immunotherapeutics	Boey L; ; Roelants M; Vandermeulen C	2021	Belgium	Intervention	1250	HCWs	4	12	0	194	1056
97	Influenza vaccination among emergency medical services and emergency department personnel.	Prehospital Emergency Care	Rueckmann E; ; Shah MN; Humiston SG	2009	New York	Cross-sectional	128	EMERGENCY DEPARTMENT PERSONNEL	1	6	50	38	40
98	Determinants of adherence to seasonal influenza vaccination among healthcare workers from an Italian region: results from a cross-sectional study.	BMJ Open	Durando P; ; Alicino C; Dini G; Barberis I; Bagnasco AM; Iudici R; Zanini M; Martini M; Toletone A; Paganino C; Massa E; Orsi A; Sasso L	2016	Italia	Cross-sectional	830	HCWs	1	8	89	651	81
99	Observational study to assess the effects of social networks on the seasonal influenza vaccine uptake by early career doctors.	BMJ Open	Edge R; ; Keegan T; Isba R; Diggle P	2019	England	Cross-sectional	138	Foundation doctors	1	8	138	0	0
100	Influenza vaccination rates among pharmacists.	Journal of American Pharmacists Association	Ruiz AD; ; Frei CR; Barner JC; Carson JJ; Oramasionwu CU; Ruiz JL; Daniels KR; Mohr JF; Klepser ME	2010	USA	Cross-sectional	1028	Pharmacists	1	7	0	0	1028
101	A novel approach to improve influenza vaccination rates among health care professionals: a prospective randomized controlled trial.	American Journal of Infection Control	Doratotaj S; ; Macknin ML; Worley S	2008	USA	A prospective randomized controlled trial	800	HCWs	4	13
102	Attitudes, believes, determinants and organisational barriers behind the low seasonal influenza vaccination uptake in healthcare workers - A cross-sectional survey.	Vaccine	Boey L; ; Bral C; Roelants M; De Schryver A; Godderis L; Hoppenbrouwers K; Vandermeulen C	2018	Belgium	Cross-sectional	5141	HCWs	1	8	559	1819	2763
103	Influenza and pneumococcal immunization in the elderly: knowledge, attitudes, and practices among general practitioners in Italy.	Journal of the Royal Institute of Public Health	Pavia M; ; Foresta MR; Carbone V; Angelillo IF	2003	Italy	Cross-sectional	148	HCWs	1	8	148	0	0
104	Acceptance of seasonal and pandemic a (H1N1) 2009 influenza vaccination by healthcare workers in a french teaching hospital.	Vaccine	Tanguy M; ; Boyeau C; Pean S; Marijon E; Delhumeau A; Fanello S	2011	France	Cross-sectional	153	HCWs	1	6	128	347	57
105	A quality improvement project to increase influenza vaccination in healthcare personnel at a university health center.	Journal of the American Association of Nurse Practitioners	Kung YM;	2014	USA	Intervention	79	HCWs	4	9
106	Survey on use of and attitudes toward influenza vaccination among emergency department staff in a New York metropolitan hospital.	infection control and hospital epidemiology	Piccirillo B; ; Gaeta T	2006	USA	Cross-sectional	200	HCWs in ED	1	6
107	Nurses' attitudes and beliefs about influenza and the influenza vaccine: a summary of focus groups in Alabama and Michigan.	American Journal of Infection Control	Willis BC; ; Wortley P	2007	USA	Qualitative	71	Nurses	3	8
108	Assessment of coverage and analysis of the determinants of adherence to influenza vaccination in the general practitioners of Taranto.	Annali di Igiene: Medicina Preventiva e di Comunita	Desiante F; ; Caputi G; Cipriani R; Nanula C; Aprile I; Pesare A; Conversano M	2017	Italy	Cross-sectional	229	GPs	1	8	229	0	0
109	Use of a mandatory declination form in a program for influenza vaccination of healthcare workers.	infection control and hospital epidemiology	Ribner BS; ; Hall C; Steinberg JP; Bornstein WA; Chakkalakal R; Emamifar A; Eichel I; Lee PC; Castellano PZ; Grossman GD	2008	USA	Retrospective observational	9214	HCWs	1	6	0	2970	6244
110	Healthcare worker's attitude to seasonal influenza vaccination in the South Tyrolean province of Italy: barriers and facilitators.	Vaccine	Rabensteiner A; ; Buja A; Regele D; Fischer M; Baldo V	2018	Italy	Cross-sectional	4091	HCWs	1	7
111	Health care workers: vectors of influenza virus? Low vaccination rate among hospital health care workers.	American Journal of Medical Quality	Beguin C; ; Boland B; Ninane J	1998	Belgium	Cross-sectional	1530	HCWs	1	8	248	622	660
112	Did the pandemic have an impact on influenza vaccination attitude? A survey among health care workers.	BMC infectious diseases	Arda B; ; Durusoy R; Yamazhan T; Sipahi OR; TaÅŸbakan M; PullukÃ§u H; Erdem E; Ulusoy S	2011	Turkey	Cross-sectional	807	HCWs	1	8	363	293	151
113	An effective strategy for influenza vaccination of healthcare workers in Australia: experience at a large health service without a mandatory policy.	BMC infectious diseases	Heinrich-Morrison K; ; McLellan S; McGinnes U; Carroll B; Watson K; Bass P; Worth LJ; Cheng AC	2015	Australia	Intervention	1328	HCWs	4	8	90	520	718
114	Quantifying preferences around vaccination against frequent, mild disease with risk for vulnerable persons: A discrete choice experiment among French hospital health care workers.	Vaccine	Godinot LD; ; Sicsic J; Lachatre M; Bouvet E; Abiteboul D; Rouveix E; Pellissier G; Raude J; Mueller JE	2021	France	Cross-sectional	1214	HCWs	1	8	128	880	206
115	Sociocognitive predictors of the intention of healthcare workers to receive the influenza vaccine in Belgian, Dutch and German hospital settings.	Journal of Hospital Infection	Lehmann BA; ; Ruiter RA; van Dam D; Wicker S; Kok G	2015	Belgium, Netherlands, and Germany	Cross-sectional	864	HCWs	1	8	152	570	142
116	Vaccination against influenza at a European pediatric cancer center: immunization rates and attitudes among staff, patients, and their families.	Support Care Cancer	Pettke A; ; Jocham S; Wiener A; LÃ¶cken A; Groenefeld J; Ahlmann M; Groll AH	2017	Germany	Cross-sectional	106	HCWs	1	8	29	41	36
117	Influenza vaccination and intention to receive the pandemic H1N1 influenza vaccine among healthcare workers of British Columbia, Canada: a cross-sectional study.	infection control and hospital epidemiology	Kaboli F; ; Astrakianakis G; Li G; Guzman J; Donovan T; Naus M	2010	Canada	Cross-sectional	4046	HCWs	1	8	NA	1853	2193
118	Influenza immunization among resident physicians in an urban teaching hospital.	American Journal of Infection Control	Ali Imtiaz M; ; Budnick LD; Berman AR	2016	USA	Cross-sectional	190		1	6	190	0	0
119	Pandemic Influenza A(H1N1) in Cote d'Ivoire: health-care providers' knowledge of influenza and attitudes towards vaccination.	Emerging Problems In Infectious Diseases	Coulibaly D; ; Nzussouo NT; Kadjo HA; TraorÃ© Y; Ekra DK; ChÃ©rif D; Kouassi PD; N'gattia AK; Dagnan SN	2013	Cote d’Ivoire	Cross-sectional	383		1	7	93	0	290
120	Attitudes toward and factors affecting influenza vaccination among physicians and nurses of a tertiary-care hospital in the Central Anatolia region of Turkey.	Postgraduate Medicine	Cihan FG; ; Durmaz FG; Odabas D; Baydemir C; Fatma K	2012	Turkey	Cross-sectional	603	Physicians and Nurses	1	8	192	411	0
121	Acceptance of H1N1 vaccine among healthcare workers at primary healthcare centres in Abha, KSA.	Journal of the Egyptian Public Health Association	Alsaleem MA;	2013	KSA	cross-seciotnal	347	physicians, nurses, technicians	1	8	95	232	20
122	Knowledge and attitudes about influenza vaccination amongst general practitioners, practice nurses, and people aged 65 and over.	THE NEW ZEALAND MEDICAL JOURNAL	Brunton C; ; Weir R; Jennings L	2004	New Zealand	Cross-sectional	590	General practitioners, practice nurses, and people aged 65	1	8	319	271	0
123	Factors associated with acceptance of pandemic flu vaccine by healthcare professionals in Spain, 2009-2010.	Research in nursing & health	FernÃ¡ndez-Villa T; ; Molina AJ; Torner N; Castilla J; Astray J; GarcÃ­a-GutiÃ©rrez S; Mayoral JM; Tamames S; DomÃ­nguez Ã; MartÃ­n V	2017	Spain	Cross-sectional	1661	HCWs	1	8	968	693	0
124	Factors influencing decisions regarding influenza vaccination and treatment: a survey of healthcare workers.	Infection Control and Hospital Epidemiology	Steiner M; ; Vermeulen LC; Mullahy J; Hayney MS	2002	Wisconsin- USA	cross-seciotnal	2200	HCWs	1	8	not determined	not determined
125	Ad Hoc Influenza Vaccination During Years of Significant Antigenic Drift in a Tropical City With 2 Seasonal Peaks: A Cross-Sectional Survey Among Health Care Practitioners.	Medicine (Baltimore)	Wong MCS; ; Nelson EAS; Leung C; Lee N; Chan MCW; Choi KW; Rainer TH; Cheng FWT; Wong SYS; Lai CKC; Lam B; Cheung TH; Leung TF; Chan PKS	2016	china	Cross-sectional	1296	healthcare professionals	1	8	488	673	104
126	Willingness to receive pandemic influenza A (H1N1) vaccine among doctors and nurses in public health facilities in Ibadan, Nigeria.	Vaccine	Fatiregun AA; ; Adeyemo AA; Olowookere SA	2012	nigeria	cross-sectional	255	doctors and nurses	1	8	43	212
127	Influenza vaccine uptake among staff in care homes in Nottinghamshire: a random cluster sample survey.	Public Health	Shroufi A; ; Copping J; Musonda P; Vivancos R; Langden V; Armstrong S; Slack R	2009	United Kingdom	cross-sectional	169	care assistants, registered nurses, matrons	1	8		35	122
128	Getting vaccinated or not getting vaccinated? Different reasons for getting vaccinated against seasonal or pandemic influenza.	Bmc Public Health	Bonfiglioli R; ; Vignoli M; Guglielmi D; Depolo M; Violante FS	2013	Italy	cross-sectional	168	HCWs	1	8	52	48	68
129	The effectiveness of vaccine day and educational interventions on influenza vaccine coverage among health care workers at long-term care facilities.	American Journal of public health	Kimura AC; ; Nguyen CN; Higa JI; Hurwitz EL; Vugia DJ	2007	Southern California/USA	Cross-sectional & intervention	1020	Nurse Nursing assistant Housekeeping staff Rehabilitation therapist	4	12	0	539	481
130	Positive attitudes of French general practitioners towards A/H1N1 influenza-pandemic vaccination: a missed opportunity to increase vaccination uptakes in the general public?	Vaccine	Schwarzinger M; ; Verger P; Guerville MA; Aubry C; Rolland S; Obadia Y; Moatti JP	2010	france	Cross-sectional	1434	GPs	1	8	1434
131	Are medical residents a "core group" for future improvement of influenza vaccination coverage in health-care workers? A study among medical residents at the University Hospital of Palermo (Sicily).	Vaccine	Amodio E; ; Tramuto F; Maringhini G; Asciutto R; Firenze A; Vitale F; Costantino C; Calamusa G	2011	Italy	Cross-sectional	202	Medical residents	1	8	202
132	Behavioral change with influenza vaccination: factors influencing increased uptake of the pandemic H1N1 versus seasonal influenza vaccine in health care personnel.	Vaccine	Kraut A; ; Graff L; McLean D	2011	Canada	Cross-sectional	684	health care personnel	1	8		228	456
133	Availability of trivalent inactivated influenza vaccine to parents of neonatal intensive care unit patients and its effect on the healthcare worker vaccination rate.	Infection Control and Hospital Epidemiology	Shah SI; ; Caprio M	2008	NYC\ USA	Questionnaire survey after an intervention-based study	112	Physicians, nurses, and other NICU-based staff	5	6	51	46	15
134	Cross-sectional survey: risk-averse French general practitioners are more favorable toward influenza vaccination.	Vaccine	Massin S; ; Ventelou B; Nebout A; Verger P; Pulcini C	2015	france	Cross-sectional	1136	GPs	1	8	1136	0	0
135	Increasing annual influenza vaccinations among healthcare workers in Rhode Island: a social marketing approach.	Medicine and health, Rhode Island	Marshall RJ; ; Tetu-Mouradjian LM; Fulton JP	2010	USA	Cross-sectional	846	HCWs (registered nurses (RNs), licensed practical nurses (LPNs), and certified nursing assistants (CNAs))	1	5	0	undetermined	undetermined
136	The impact of the 2009 influenza A(H1N1) pandemic on attitudes of healthcare workers toward seasonal influenza vaccination 2010/11.	Eurosurveillance	Brandt C; ; Rabenau HF; Bornmann S; Gottschalk R; Wicker S	2011	Germany	Cross-sectional	1323	HCWs	1	7	505	394	424
137	Acceptance of a vaccine against pandemic influenza A (H1N1) virus amongst healthcare workers in Beijing, China.	Vaccine	Seale H; ; Kaur R; Wang Q; Yang P; Zhang Y; Wang X; Li X; Zhang H; Zhang Z; MacIntyre CR	2011	China	Cross-sectional after implementation of a mandatory vaccination program	1657	HCWs	1	7	604	1044	9
138	Knowledge, attitudes, and practices of seasonal influenza vaccination in healthcare workers, Honduras.	PLOS ONE	Madewell ZJ; ; ChacÃ³n-Fuentes R; Jara J; MejÃ­a-Santos H; Molina IB; Alvis-Estrada JP; Ortiz MR; Coello-Licona R; Montejo B	2021	Honduras	Cross-sectional	947	HCWs	1	8	184	141	622
139	Vaccination against pandemic influenza A/H1N1 among healthcare workers and reasons for refusing vaccination in Istanbul in last pandemic alert phase.	Vaccine	Torun SD; ; Torun F	2010	Turkey	Cross-sectional	718	HCWs	1	8	215	152	351
140	Employee designation and health care worker support of an influenza vaccine mandate at a large pediatric tertiary care hospital.	Vaccine	Feemster KA; ; Prasad P; Smith MJ; Feudtner C; Caplan A; Offit P; Coffin SE	2011	USA	Cross-sectional	1388	HCWs	1	8	not determined	not determined
141	Attitudes and practices regarding influenza vaccination among emergency department personnel.	The Journal of Emergency Medicine	Fernandez WG; ; Oyama L; Mitchell P; Edwards EM; St George J; Donovan J; Feldman JA	2009	USA	Cross-sectional	126	EMERGENCY DEPARTMENT staff	1	8	68	58	0
142	Attitudes and behavior of health care personnel regarding influenza vaccination.	European Journal of Epidemiology	Ballada D; ; Biasio LR; Cascio G; D'Alessandro D; Donatelli I; Fara GM; Pozzi T; Profeta ML; Squarcione S; RiccÃ² D; et al.	1994	Italy	cross-seciotnal	1129	HCws	1	5	781	227	121
143	High coverage of influenza vaccination among healthcare workers can be achieved during heightened awareness of impending threat.	Annals Academy of Medicine	Yang KS; ; Fong YT; Koh D; Lim MK	2007	Singapore	Cross-sctional	634	HCWs	1	7	104	280	250
144	Attitudes of pediatricians regarding influenza self-immunization: a survey in a Swiss university children's hospital.	The Pediatric infectious disease journal	Heininger U; ; BÃ¤chler M; Schaad UB	2003	Switzerland	cross-sectional	71	physicians	1	5	71	0	0
145	Acceptance of a vaccine against novel influenza A (H1N1) virus among health care workers in two major cities in Mexico.	Archives of Medical Research	Esteves-Jaramillo A; ; Omer SB; Gonzalez-Diaz E; Salmon DA; Hixson B; Navarro F; Kawa-Karasik S; Frew P; Morfin-Otero R; Rodriguez-Noriega E; Ramirez Y; Rosas A; Acosta E; Varela-Badillo V; Del Rio C	2009	Mexico	Cross-sectional	1097	HCWs	1	8	438	625	0
146	Predicting influenza vaccination uptake among health care workers: what are the key motivators?	American Journal of Infection Control	Corace K; ; Prematunge C; McCarthy A; Nair RC; Roth V; Hayes T; Suh KN; Balfour L; Garber G	2013	Canada	Cross-sectional	3275	HCWs	1	8	171	1153	1951
147	Knowledge, attitudes, and practices for the use of seasonal influenza vaccination, healthcare workers, Costa Rica.	Vaccine	Madewell Z; ; ChacÃ³n-Fuentes R; Badilla-Vargas X; Ramirez C; Ortiz MR; Alvis-Estrada JP; Jara J	2021	Costa rica	Cross-sectional	747	HCWs	1	8	196	201	350
148	Influenza vaccination among registered nurses: information receipt, knowledge, and decision-making at an institution with a multifaceted educational program.	infection control and hospital epidemiology	Ofstead CL; ; Tucker SJ; Beebe TJ; Poland GA	2008	USA	Cross-sectional	513	registered nurses (RNs)	1	8	0	513	0
149	Which determinants should be targeted to increase influenza vaccination uptake among health care workers in nursing homes?	Vaccine	Looijmans-van den Akker I; ; van Delden JJ; Verheij TJ; van Essen GA; van der Sande MA; Hulscher ME; Hak E	2009	Netherlands	Cross-sectional	1125	HCWs	1	8	58	172	895
150	Seasonal flu vaccination, a matter of emotion? An experimental study on role of compassion, socioeconomic status and perceived threat among healthcare workers.	Psychology & Health	Bodelet C; ; Bodelet J; Landelle C; Gauchet A	2021	France	Randomized clinical trail	309	HCWs	4	11	72	170	67
151	Improved influenza vaccination coverage among health-care workers: evidence from a web-based survey in China, 2019/2020 season.	Human Vaccines & Immunotherapeutics	Yi H; ; Yang Y; Zhang L; Zhang M; Wang Q; Zhang T; Zhang Y; Qin Y; Peng Z; Leng Z; Yang W; Zheng J; Liang X; Feng L	2021	China	Cross-sectional	4595	HCWs(clinicians,nurses,medical technicians,6% other categories)	1	8	1332	1283	1880
152	Testing an integrative theory of health behavioural change for predicting seasonal influenza vaccination uptake among healthcare workers.	Vaccine	Ng TWY; ; Cowling BJ; So HC; Ip DKM; Liao Q	2020	Hong Kong	Cross-sectional	845	Nurses 42.8% Other HCPs 57.2%	1	8	37	356	452
153	Factors contributing to declination of annual influenza vaccination by healthcare workers caring for cancer patients: An Australian experience.	Vaccine	Surtees TC; ; Teh BW; Slavin MA; Worth LJ	2018	Australia	Cross-sectional retrospectively	1835	HCWs	5	4
154	"PErCEIVE in Umbria": evaluation of anti-influenza vaccination's perception among Umbrian pharmacists.	Journal of Preventive Medicine and Hygiene	Gianfredi V; ; Nucci D; Salvatori T; Orlacchio F; Villarini M; Moretti M	2018	Umbria - Italy	Cross-sectional	72	Community pharmacists	1	8	0	0	72
155	Seasonal and H1N1 influenza vaccine compliance and intent to be vaccinated among emergency medical services personnel.	American Journal of Infection Control	Rebmann T; ; Wright KS; Anthony J; Knaup RC; Peters EB	2012	USA	Cross-sectional	265	emergency medical services personnel	1	8	not determined	not determined
156	Healthcare workers under a mandated H1N1 vaccination policy with employment termination penalty: a survey to assess employee perception.	Vaccine	Winston L; ; Wagner S; Chan S	2014	USA	cross-sectional	202		1	7	68	97	25
157	Using a validated health promotion tool to improve patient safety and increase health care personnel influenza vaccination rates.	American Journal of Infection Control	Real K; ; Kim S; Conigliaro J	2013	USA	mixed cross-sectional	318	80% HCWs 20% non clinical support staff	3	6
158	Factors influencing uptake of influenza vaccine amongst healthcare workers in a regional center after the A(H1N1) 2009 pandemic: lessons for improving vaccination rates.	International Journal of Risk & Safety in Medicine	Tagajdid MR; ; El Annaz H; Belefquih B; Doblali T; Casalegno JS; Mekki Y; Mrani S	2011	Morocco	cross-sectional	721	HCWs	1	8	195	158	368
159	Personal choice or evidence-based nursing intervention: nurses' decision-making about influenza vaccination.	Worldviews on Evidence-Based Nursing	Rhudy LM; ; Tucker SJ; Ofstead CL; Poland GA	2010	USA	Qualitative	914	Nurses	3	8	0	14	0
160	Impact of severe acute respiratory syndrome and the perceived avian influenza epidemic on the increased rate of influenza vaccination among nurses in Hong Kong.	infection control and hospital epidemiology	Tam DK; ; Lee SS; Lee S	2008	Hong Kong	cross-sectional	941	Nurses	1	8	0	941	0
161	The intention to get vaccinated against influenza and actual vaccination uptake of Dutch healthcare personnel.	Vaccine	Lehmann BA; ; Ruiter RAC; Chapman G; Kok G	2014	Germany	longitudinal survey	556	HCWs	1	8	94	139	323
162	Perceived risks of adverse effects and influenza vaccination: a survey of hospital employees.	European Journal of Public Health	Ehrenstein BP; ; Hanses F; Blaas S; Mandraka F; Audebert F; Salzberger B	2010	Germany	cross-sectional	652	HCWs	1	8	234	277	141
163	Knowledge, Perception, Attitudes and Behavior on Influenza Immunization and the Determinants of Vaccination.	Journal of Epidemiology and Global Health	Choucair K; ; El Sawda J; Assaad S; El Chakhtoura NG; Hassouna H; Sidani N; Yasmin M; Rteil A; Kanj SS; Kanafani ZA	2021	Lebanon	cross-sectional	247	HCWs students, adults, etc only taking results of hcw	1	8	not determined	not determined	not determined
164	Description of an influenza vaccination campaign and use of a randomized survey to determine participation rates.	Infection control and hospital epidemiology	Tao XG; ; Giampino J; Dooley DA; Humphrey FE; Baron DM; Bernacki EJ	2010	USA	campaign	1084	HCWs	5	6
165	Influenza vaccination: opinions of health care professionals working in pediatric emergency departments.	Italian journal of pediatrics	Pinto L; ; Falsaperla R; Villani A; Corsello G; Del Gado R; Mazzeo A; Lubrano R	2019	Italy	cross-sectional	504	HCWs	1	6	331	140	33
166	Occupational vaccination of health care workers: uptake, attitudes and potential solutions.	Public health	Little KE; ; Goodridge S; Lewis H; Lingard SW; Din S; Tidley M; Roberts RJ; Williams NS; Hayes S	2015	UK	cross-sectional	133	HCWs	1	7	18	54	61
167	Implementing a declination form programme to improve influenza vaccine uptake by staff in Department of Veterans Affairs spinal cord injury centres: a pilot study.	The Journal of hospital infection,	Hill JN; ; Smith BM; Evans CT; Anaya H; Goldstein B; LaVela SL	2015	USA	A pilot study (Intervention) N=7	7	HCWs	5	6	2	3	2
168	Self-reported influenza vaccination rates and attitudes towards vaccination among health care workers: results of a survey in a German university hospital.	Public health	Hagemeister MH; ; Stock NK; Ludwig T; Heuschmann P; Vogel U	2018	Germany	cross-sectional	677	HCWs	1	6	239	418	20
169	Seasonal Influenza Vaccination Effectiveness and Compliance among Hospital Health Care Workers.	Public health	Atamna Z; ; Chazan B; Nitzan O; Colodner R; Kfir H; Strauss M; Schwartz N; Markel A	2016	Israel	prospective cohort	1641	HCWs	2	8	498	862	281
170	Pandemic A(H1N1)2009 influenza vaccination in Lyon University Hospitals, France: perception and attitudes of hospital workers.	Vaccine	Valour F; ; BÃ©net T; Chidiac C	2013	France	cross-sectional	1630	HCWs	1	7	239	< 118 (others; nrses are among them)	> 1273
171	Seasonal influenza vaccination coverage and its determinants among nursing homes personnel in western France.	BMC public health	Elias C; ; Fournier A; Vasiliu A; Beix N; Demillac R; Tillaut H; Guillois Y; Eyebe S; Mollo B; CrÃ©pey P	2017	France	cross-sectional	480	Nurses	1	7	0	480	0
172	Actions and beliefs related to hepatitis B and influenza immunization among registered nurses in Texas.	Public health nursing (Boston, Mass.)	McEwen M; ; Farren E	2005	USA	cross-sectional	246	Nurses	1	5	0	246	0
173	Influenza vaccination coverage and obstacles in healthcare workers (HCWs) and the follow up of side effects: a multicenter investigation in Iran.	Journal of preventive medicine and hygiene	Hajiabdolbaghi M; ; Havastin NG; Afhami S; Montazeri M; Mohammadnejad E; Rezaei P; Hajinoori M; Ghahan A; Afifeh A; Vesroudi RB; Hadadi A; Asadollahi-Amin A; Seifi A	2021	Iran	cross-secional	637	HCWs	1	5	not determined	not determined	not determined
174	Support for mandatory health care worker influenza vaccination among allied health professionals, technical staff, and medical students.	American Journal of Infection Control	Banach DB; ; Zhang C; Factor SH; Calfee DP	2013	USA	cross-sectional	116	HCWs	1	7	not determined	not determined	not determined
175	Influenza vaccination of staff in aged care facilities in the ACT: how can we improve the uptake of influenza vaccine?	Australian and New Zealand journal of public health	Halliday L; ; Thomson JA; Roberts L; Bowen S; Mead C	2003	Australia	cross-sectional	587	HCWs in aged care facilities	1	5	0	381	206
176	"You Have to Die Not to Come to Work": A Mixed Methods Study of Attitudes and Behaviors regarding Presenteeism, Absenteeism and Influenza Vaccination among Healthcare Personnel with Respiratory Illness in Israel, 2016-2019.	Vaccine	Gur-Arie R; ; Katz MA; Hirsch A; Greenberg D; Malosh R; Newes-Adeyi G; Davidovitch N; Rosenthal A	2021	Israel	mixed methods	70	HCWs reecntly ill with respiratory illness	3	8	16	45	9
177	Lack of compliance with influenza immunization for caretakers of neonatal intensive care unit patients.	American Journal of Infection Control	Eisenfeld L; ; Perl L; Burke G; Blackington S; York E; Regan H; Siddell E; Holman M	1994	USA	cross-sectional	152	Nurses at neonatal intensive care unit	1	6	0	152	0
178	Motivating factors for high rates of influenza vaccination among healthcare workers.	Vaccine	Hakim H; ; Gaur AH; McCullers JA	2011	USA	cross-sectional	879	HCWs	1	6	not determined	715	not determined
179	Knowledge and attitudes of healthcare workers about influenza: why are they not getting vaccinated?	Infection Control And Hospital Epidemiology	Heimberger T; ; Chang HG; Shaikh M; Crotty L; Morse D; Birkhead G	1995	China	Cross-sectional	922	HCWs	1	7	17	119	786
180	Willingness of Hong Kong healthcare workers to accept pre-pandemic influenza vaccination at different WHO alert levels: two questionnaire surveys.	BMJ	Chor JS; ; Ngai KL; Goggins WB; Wong MC; Wong SY; Lee N; Leung TF; Rainer TH; Griffiths S; Chan PK	2009	Hnog Kong	2 cross-sectional surveys, 1 before the WHO alert about the H5N1 pandemic and the other one was done after the alert	2255	HCWs	1	7	167 (from the first survey; second is not determined)	1327 (from the first survey; second is not determined)
181	The impact of COVID-19 on hospital-based workers influenza vaccination uptake: A two-year retrospective cohort study.	Journal of Occupational Health	Albanesi B; ; Clari M; Gonella S; Chiarini D; Aimasso C; Mansour I; Coggiola M; Charrier L; Dimonte V	2022	Italy	retrospective cohort study	10885	HCWs	2	9	1639 (in 2019/2020) AND 1761 in 2020/2021	3725 in 2019/2020 AND 3818 in 2020/2021
182	Psychosocial determinants of influenza vaccination intention: A cross-sectional study on inpatient nurses in Singapore.	American Journal of Infection Control	Lim DW; ; Lee LT; Kyaw WM; Chow A	2017	Singapore	Cross-sectional	774	Nurses	1	6	0	774	0
183	Influenza vaccination in healthcare workers.	The Journal of Infection in Developing Countries	Naz H; ; Cevik F; Aykin N	2009	Turkey	Intervention	547	HCWs	5	8	57	172	343
184	Healthcare workers and influenza vaccination: an ERS-ESCMID Web-based survey.	Clinical Microbiology and Infection	Blasi F; ; Palange P; Rohde G; Severin T; Cornaglia G; Finch R	2011	83 Country	Cross-sectional	1334	Physicians	1	7	not determined	not determined	not determined
185	Likely uptake of swine and seasonal flu vaccines among healthcare workers. A cross-sectional analysis of UK telephone survey data.	Vaccine	Rubin GJ; ; Potts HW; Michie S	2011	UK	Cross-sectional	3129	HCWs	1	5	not determined	not determined	not determined
186	INFLUENZA VACCINATION UPTAKE AMONG HEALTHCARE WORKERS AT A MALAYSIAN TEACHING HOSPITAL.	Medical Journal of Malaysia	Rashid ZZ; ; Jasme H; Liang HJ; Yusof MM; Sharani ZZ; Mohamad M; Ismail Z; Sulong A; Jalil NA	2015	Malaysia	Cross-sectional	211	HCWs	1	6	23	48	140
187	Increasing seasonal influenza vaccination among high risk groups in China: Do community healthcare workers have a role to play?	Vaccine	Song Y; ; Zhang T; Chen L; Yi B; Hao X; Zhou S; Zhang R; Greene C	2017	China	Cross-sectional	1301	HCWs	1	6	not determined	not determined	not determined
188	Health care workers' influenza vaccination: motivations and mandatory mask policy.	Occupational Medicine	Dorribo V; ; Lazor-Blanchet C; Hugli O; Zanetti G	2015	Switzerland	Retrospective cohort	472	HCWs	2	7	2nd most respondents	the most respondents	not determined
189	Seasonal influenza vaccination of healthcare employees: results of a 4-year campaign.	Infection Control and Hospital Epidemiology	Hirsch P; ; Hodgson M; Davey V	2011	USA	Cross-sectional	not determined		1	7	not determined	not determined	not determined
190	Intention of nurses to accept coronavirus disease 2019 vaccination and change of intention to accept seasonal influenza vaccination during the coronavirus disease 2019 pandemic: A cross-sectional survey.	Vaccine	Wang K; ; Wong ELY; Ho KF; Cheung AWL; Chan EYY; Yeoh EK; Wong SYS	2020	Hong Kong	Cross-sectional	806	Nurses	1	8	0	806	0
191	Effectiveness of an educational intervention on seasonal influenza vaccination campaign adherence among healthcare workers of the Palermo University Hospital, Italy.	Medicina Preventiva e di Comunita	Costantino C; ; Restivo V; Gaglio V; Lanza GLM; Marotta C; Maida CM; Mazzucco W; Casuccio A; Torregrossa MV; Vitale F	2019	Italy	Intervention	125	HCWs	1	6	not determined	not determined	not determined
192	Factors influencing seasonal influenza vaccination uptake among health care workers in an adult tertiary care hospital in Singapore: A cross-sectional survey.	American Journal of Infection Control	Kyaw WM; ; Chow A; Hein AA; Lee LT; Leo YS; Ho HJ	2019	Singapore	Cross-sectional	3955	HCWs	1	7	411	2253	1291
193	Factors associated with influenza vaccination of general medicine interns in Nancy, France, in 2017.	European Journal of Clinical Microbiology & Infectious Diseases	Attinsounon CA; ; Cordonnier C; Pulcini C; Di-Patrizio P; Thilly N; May T	2019	France	Cross-sectional	266	General Medicine Interns (GMI).	1	6	266	0	0
194	Determinants of intention to get vaccinated against novel (pandemic) influenza A H1N1 among health-care workers in a nationwide survey.	Infection, Disease, and Health	Maltezou HC; ; Dedoukou X; Patrinos S; Maragos A; Poufta S; Gargalianos P; Lazanas M	2010	Greece	Cross-sectional	1591	Nurses	1	6	480	607	504
195	Barriers and facilitators to influenza vaccination and vaccine coverage in a cohort of health care personnel.	American Journal of Infection Control	Naleway AL; ; Henkle EM; Ball S; Bozeman S; Gaglani MJ; Kennedy ED; Thompson MG	2014	USA	Retrospective Cohort	1701	HCWs	2	7	230	576	895
196	Achieving optimal influenza vaccination rates: a survey-based study of healthcare workers in an urban hospital.	Journal of Hospital Infection	Mehta M; ; Pastor CA; Shah B	2008	Lebanon	Cross-sectional	570		1	6	190	114	266
197	Knowledge, attitude and awareness among healthcare professionals about influenza vaccination in Peshawar, Pakistan.	Vaccine	Khan, Tahir Mehmood; Khan, Aziz Ullah; Ali, Iftikhar; Wu, David Bin-Chia	2016	Pakistan	Cross-sectional	165	HCWs	1	7	77	49	39
198	Are Kenyan healthcare workers willing to receive the pandemic influenza vaccine? Results from a cross-sectional survey of healthcare workers in Kenya about knowledge, attitudes and practices concerning infection with and vaccination against 2009 pandemi	Vaccine	Oria, Prisca A.; Matini, Wycliffe; Nelligan, Ian; Emukule, Gideon; Scherzer, Martha; Oyier, Beryl; Ochieng, Hezron N.; Hooper, Laura; Kanyuga, Anne; Muthoka, Phillip; Morales, Kathleen F.; Nzioka, Charles; Breiman, Robert F.; Katz, Mark A.	2011	Kenya	Mixed (questionnaire and focus groups)	659	HCWs	1	6	29	205	425
199	Knowledge, attitudes and practices of health care workers in a cardiology department on influenza vaccination	Vaccine	Benedict Kpozehouen, E.; Arrudsivah, B.; Raina Macintyre, C.	2023	Australia	mixed (survey and focus groups)	74	Nurses	3	8
200	Healthcare Workers' Attitudes toward Influenza Vaccination: A Behaviour and Social Drivers Survey	Vaccines MDPI	Jiang, B.; Cao, Y.; Qian, J.; Jiang, M.; Huang, Q.; Sun, Y.; Dai, P.; Yi, H.; Zhang, R.; Xu, L.; Zheng, J.; Yang, W.; Feng, L.	2023	China	Cross-sectional	17832	HCWs	1	5	not determined	not determined	not determined
201	Seasonal Influenza Vaccine Intention among Nurses Who Have Been Fully Vaccinated against COVID-19: Evidence from Greece	Vaccines MDPI	Galanis, P.; Katsiroumpa, A.; Vraka, I.; Siskou, O.; Konstantakopoulou, O.; Katsoulas, T.; Kaitelidou, D.	2023	Greece	Cross-sectional	861	Nurses	1	7	0	861	0
202	The Vaccine Hesitancy Profiles and Determinants of Seasonal Influenza among Chinese Community Healthcare Workers: A Cross-Sectional Study	Vaccines MDPI	Yang, X.; Tang, W.; Tan, Q.; Mao, D.; Ding, X.	2022	China	Cross-sectional	1142	HCWs	1	7	not determined	not determined	not determined
203	The Role of Psychological Factors and Vaccine Conspiracy Beliefs in Influenza Vaccine Hesitancy and Uptake among Jordanian Healthcare Workers during the COVID-19 Pandemic	Vaccines MDPI	Sallam, M.; Ghazy, R.M.; Al-Salahat, K.; Al-Mahzoum, K.; AlHadidi, N.M.; Eid, H.; Kareem, N.; Al-Ajlouni, E.; Batarseh, R.; Ababneh, N.A.; Alsanafi, M.; Umakanthan, S.; Al-Tammemi, A.B.; Bakri, F.G.; Harapan, H.; Mahafzah, A.; Al Awaidy, S.T.	2022	Jordan	Cross-sectional	1218	HCWs	1	8	367	412	439
204	Establish the habit: influenza vaccination for health care personnel.	Journal of Healthcare Qualtiy	Nowalk MP; Lin CJ; Zimmerman RK; Fox DE; Raymund M; Tanis MD; Harper JD	2010	USA	Cross-sectional	837	HCWs	1	8	not determined	not determined	not determined
205	Public health worker attitudes and beliefs concerning 2009 H1N1 and seasonal influenza vaccines.	American Journal of Infection Control	Walker, Daniel W.; Sloan, Sarah Stuart; Kozlica, Jennifer D.	2012	southeastern Tennessee	cross-sectional cohort study	295	HCWs	1	5	8	not determined	not determined
206	Self-reported influenza vaccination rates among health care workers in a large health system.	American Journal of Infection Control	Nowalk MP; Lin CJ; Zimmerman RK; Fox DE; Raymund M; Tanis MD; Harper JD; Willis BC	2008	US	cross sectional	726	HCWs	1	8
207	The Impact of Vaccine Concerns on Racial/Ethnic Disparities in Influenza Vaccine Uptake Among Health Care Workers.	American journal of public health	Ojha, Rohit P.; Stallings-Smith, Sericea; Flynn, Patricia M.; Adderson, Elisabeth E.; Offutt-Powell, Tabatha N.; Gaur, Aditya H.	2015	Tennessee, US	cross sectional	2340	HCWs	1	8
208	"I don't see an added value for myself": a qualitative study exploring the social cognitive variables associated with influenza vaccination of Belgian, Dutch and German healthcare personnel	BMC public health	Lehmann, BA; Ruiter, RAC; Wicker, S; van Dam, D; Kok, G	2014	Belgium ,Germany and netherlands	semi-structured qualitative	123	HCP	3	9	32	57	27
209	Knowledge, Current Status, and Barriers toward Healthcare Worker Vaccination among Family Medicine Resident Participants in a Web-Based Survey in Korea	Korean journal of family medicine	Ko, K; Kim, S; Kim, SH; Son, KY; Lee, J; Lee, DR	2017	Korea	cross sectional	242	family medicine residents	1	8
210	The Knowledge Level of Hospital Staff about Influenza and Pneumococcal Vaccination	CYPRUS JOURNAL OF MEDICAL SCIENCES	Evren, H; Evren, EU; Ozcem, SB; Yazgan, ZO; Baris, SA; Yildiz, F	2019	cyprus	cross sectional	225	Hospital staff included HCW and administrative staff	1	7
211	Exploring influenza vaccine hesitancy in community pharmacies: Knowledge, attitudes and practices of community pharmacists in Ontario, Canada	Canadian pharmacists journal	Pullagura, GR; Violette, R; Houle, SKD; Waite, NM	2020	Canada	cross-sectional	885	community pharmacists	1	7
212	Australian general practice nurse's knowledge, attitudes and practices regarding influenza vaccination: a cross-sectional survey	Journal of Clinical Nursing	Smith, S; Sim, J; Halcomb, E	2016	Australia	cross sectional	85	GPNs	1	7
213	"I wouldn't really believe statistics" - Challenges with influenza vaccine acceptance among healthcare workers in Singapore	Vaccine	Sundaram, N; Duckett, K; Yung, CF; Thoon, KC; Sidharta, S; Venkatachalam, I; Chow, A; Yoong, J	2018	Singapore	qualitative	73	HCWs	3	8	19	22	32
214	Influenza vaccine uptake, determinants, motivators, and barriers of the vaccine receipt among healthcare workers in a tertiary care hospital in Saudi Arabia	Journal of Hospital Infection	Haridi, HK; Salman, KA; Basaif, EA; Al-Skaibi, DK	2017	Saudi Arabia	cross-sectional	447	HCWs	1	8
215	Seasonal influenza vaccination coverage and barriers among healthcare workers in an Egyptian Province	La Medicina del lavoro	Waheed, A; Waheeb, Y; Hassan, A; Fahim, AE	2020	egypt	cross-sectional	980	HCWs	1	8
216	Influenza vaccine: Immunization rates, knowledge and attitudes of healthcare workers in Jordan	Kuwait Medical Journal	Alhalaseh, L; Yasein, N	2020	jordan	Cross-sectional	744	HCWs	1	7
217	Factors associated with influenza vaccination among healthcare workers in acute care hospitals in Canada	Influenza and other respiratory viruses	Canadian Hlth Care Worker Study; Hussain, H; McGeer, A; McNeil, S; Katz, K; Loeb, M; Simor, A; Powis, J; Langley, J; Muller, M; Coleman, BL	2018	canada	prospective cohort study	2436	HCWs	2	8
218	The continuum of influenza vaccine hesitancy among nursing professionals in Hong Kong	Vaccine	Lau, LHW; Lee, SS; Wong, NS	2020	HONG KONG	cross-sectional	753	Nurses	1	8
219	Monitoring influenza vaccination coverage and acceptance among health-care workers in German hospitals - results from three seasons	Human vaccines & immunotherapeutics	Neufeind, J; Wenchel, R; Boedeker, B; Wicker, S; Wichmann, O	2021	Germany	cross sectional	27163	HCWs	1	8
220	Vaccination against Influenza among Health Care Workers in Al Mashaer during Hajj 2019 (1440 H); Uptake and Barriers	Middle east journal of family medicine	Alqahtani, FM; Kamel, SA; Almudarra, S; Mathkour, AA	2022	Saudi Arabia	cross sectional	760	HCWs	1	8
221	Knowledge, Attitude, Awareness, and Barriers Toward Influenza Vaccination Among Medical Doctors at Tertiary Care Health Settings in Peshawar, Pakistan-A Cross-Sectional Study	Frontiers in public health	Ali, I; Ijaz, M; Rehman, IU; Rahim, A; Ata, H	2018	Pakistan	cross sectional	215	medical doctors	1	8
222	Predictive factors associated with the acceptance of pandemic and seasonal influenza vaccination in health care workers and students in Tuscany, Central Italy	Human vaccines & immunotherapeutics	Bonaccorsi, G; Lorini, C; Santomauro, F; Guarducci, S; Pellegrino, E; Puggelli, F; Balli, M; Bonanni, P	2013	Italy	cross sectional	2598	HCWs	1	8
223	Predictors of seasonal influenza vaccination behaviour among nurses and implications for interventions to increase vaccination uptake: A cross-sectional survey	International Journal of Nursing Studies	Kan, T; Ai, JQ; Zhang, J; Liu, XH	2018	China	cross sectional	895	nurses	1	8
224	A Successful Strategy for Increasing the Influenza Vaccination Rate of Healthcare Workers without a Mandatory Policy Outside of the United States: A Multifaceted Intervention in a Japanese Tertiary Care Center	Infection control and hospital epidemiology	Honda, H; Sato, Y; Yamazaki, A; Padival, S; Kumagai, A; Babcock, H	2013	japan	intervention study	1581	HCWs	5	5
225	Influenza vaccination among nursing professionals: reality and challenges	acta paulista de enfermagem	Vieira, RHG; Erdmann, AL; de Andrade, SR; Freitas, PF	2012	brazil	cross-sectional	265	nurses	1	7
226	Reasons why nurses decline influenza vaccination: a qualitative study	BMC nursing	Pless, A; McLennan, SR; Nicca, D; Shaw, DM; Elger, BS	2017	Switzerland	qualitative semi-structured	18	nurses	3	8	0	18	0
227	Seasonal influenza vaccination and recommendation: The difference between general practitioners and public health workers in China	Vaccines	Rong, H.; Lai, X.; Ma, X.; Hou, Z.; Li, S.; Jing, R.; Zhang, H.; Peng, Z.; Feng, L.; Fang, H.	2020	china	cross sectional	1159	HCWs	1	8
228	Uptake of and attitudes towards influenza vaccination among danish hospital healthcare workers	Danish medical journal	Lindvig, S.O.; Larsen, L.	2021	Denmark	cross sectional	3125	HCWs	1	8
229	Factors associated with seasonal influenza vaccination among nursing staff of three teaching hospitals affiliated to kerman university of medical sciences, iran	Shiraz E-Medical Journal	Khalooei, A.; Bafti, M.S.	2021	Iran	case-control	435	Nursing Staff	1	6	0	435	0
230	Healthcare staff perceptions towards influenza and potential COVID-19 vaccination in the 2020 pandemic context	The Journal of hospital infection	Robbins, T.; Berry, L.; Wells, F.; Randeva, H.; Laird, S.	2021	UK	cross sectional	593	HCWs	1	7
231	Healthcare workersâ€™ willingness to receive influenza vaccination in the context of the covid-19 pandemic: A survey in southern Italy	Vaccines	Di Giuseppe, G.; Pelullo, C.P.; Paolantonio, A.; Della Polla, G.; Pavia, M.	2021	Italy	cross sectional	490	HCWs	1	8
232	Attitudes and uptake of seasonal Influenza Vaccination for Health Service Executive (HSE) Staff.	Irish medical journal	Quintyne, K.I.; Daly, E.; Brabazon, E.; Finnegan, P.; Kavanagh, P.	2018	Ireland	cross-sectional cohort	70	HCWs	1	4	0	31	39
233	Practicing, attitudes and beliefs of physicians at Al-Emamain medical city towards seasonal influenza vaccination	Indian Journal of Public Health Research and Development	Hussain, N.A.; Al-Yasseri, B.J.H.	2019	Iraq	cross-sectional	306	physicians	1	7
234	Knowledge, attitude, and practice of influenza vaccine immunization among primary healthcare providers in Dubai health authority, 2016-2017	Human Vaccines & Immunotherapeutics	AlMarzooqi, L.M.; AlMajidi, A.A.; AlHammadi, A.A.; AlAli, N.; Khansaheb, H.H.	2018	UAE	cross-sectional	431	HCWs: medical, Nurses, Dental	1	8
235	Vaccination against seasonal or pandemic influenza in emergency medical services	Prehospital and Disaster Medicine	Moser, A.; Mabire, C.; Hugli, O.; Dorribo, V.; Zanetti, G.; Lazor-Blanchet, C.; Carron, P.-N.	2016	Switzerland	cross-sectional	62	Emergency Medical Services workers	1	8
236	Understanding motivators and barriers of hospital-based obstetric and pediatric health care worker influenza vaccination programs in Australia	HUMAN VACCINES & IMMUNOTHERAPEU	Tuckerman, J.L.; Shrestha, L.; Collins, J.E.; Marshall, H.S.	2016	Australia	Semi-structured interviews	22	HCWs	3	8	2	14	6
237	Could university training and a proactive attitude of coworkers be associated with influenza vaccination compliance? A multicentre survey among Italian medical residents Assessment and evaluation of admissions, knowledge, skills and attitudes	BMC Medical Education	Costantino, C.; Amodio, E.; Calamusa, G.; Vitale, F.; Mazzucco, W.	2016	Italy	retrospective cohort study	2506	Medical residents	1	1	2506	0	0
238	Influenza vaccination motivators among healthcare personnel in a large acute care hospital in Israel	Israel Journal of Health Policy Research	Nutman, A.; Yoeli, N.	2016	Israel	cross-sectional	468	HCWs, inclusing Doctors, Nurses and Allied health professionals	1	7
239	Pandemic influenza A (H1N1) vaccination among libyan health care personnel: A cross-sectional retrospective study	Journal of Pharmacy and Bioallied Sciences	Hwisa, N.T.; Katakam, P.; Chandu, B.R.; Ismael, M.H.; Bader, A.	2014	Libya	cross‑sectional	268	Physicians (including physicians, surgeons and specialists) and other staff(nurses, pharmacists, technicians and cleaning personnel).	1	7
240	Accounting for personal and professional choices for pandemic influenza vaccination amongst English healthcare workers	Vaccine	Marcu, A.; Rubinstein, H.; Michie, S.; Yardley, L.	2015	England	semi-structured interviews and focus groups	25	General Practitioner, Nurse Practitioner, practice nurse	3	8		9	16
241	Comparative acceptance of pertussis and influenza immunization among health-care personnel	Vaccine	Ryser, A.-J.; Heininger, U.	2015	Switzerland	cross‑sectional	303	HCWs	1	8
242	Factors affecting uptake of recommended immunizations among health care workers in South Australia	Human Vaccines & Immunotherapeutics	Tuckerman, J.L.; Collins, J.E.; Marshall, H.S.	2015	Australia	cross‑sectional	92	HCWs ( Nurse,Admin Staff, Doctor, Allied Health)	1	7
243	The effect of physicians' awareness on influenza and pneumococcal vaccination rates and correlates of vaccination in patients with diabetes in Turkey: An epidemiological Study "diaVAX"	Human Vaccines & Immunotherapeutics	Satman, I.; Akalin, S.; Cakir, B.; Altinel, S.; Comlekci, A.; Yurumez, A.; Gozeten, A.; Aktan, A.H.; Kaya, A.; Aydemir, A.; Sonmez, A.; Oge, A.A.; Carlioglu, A.K.; Dalbeler, A.G.; Helvaci, A.; Moral, B.; Dolay, C.; Arslan, C.; Binici, D.N.; Tuncel, E.; Yalcin, F.A.; Erdemir, F.; Saygili, F.; Koc, G.; Demirci, H.; Altunbas, H.; Dokmetas, H.S.; Saglam, H.; Aksoy, K.; Karakoc, M.C.; Gemici, M.; Ozak…	2013	Turkey	epidemiological study was designed with retrospective and prospective arms (cross sectional+Training program)	44	physicians	1	3	44
244	Visualizing knowledge and attitude factors related to influenza vaccination of physicians	Vaccine	AntÃ³n-Ladislao, A.; GarcÃ­a-GutiÃ©rrez, S.; Soldevila, N.; GonzÃ¡lez-Candelas, F.; Godoy, P.; Castilla, J.; Mayoral, J.M.; Astray, J.; MartÃ­n, V.; Tamames, S.; Toledo, D.; Aguirre, U.; DomÃ­nguez, A.; Alonso, J.; CalerÃ³, S.; CaylÃ , J.; Torner, N.; Diaz, J.; Cenoz, M.G.; Quintana, J.M.; GonzÃ¡lez, A.B.	2015	Spain	cross-sectional	835	primary healthcare family physicians	1	8
245	Nurses' knowledge and risk perception towards seasonal influenza and vaccination and their vaccination behaviours: A cross-sectional survey	International Journal of Nursing Studies	Zhang, J.; While, A.E.; Norman, I.J.	2011	United Kingdom	cross-sectional	522	nurses	1	8
246	Factors influencing H1N1 vaccination among primary health care workers: A cross-sectional study	International Journal of Preventive Medicine	Aziz, N.A.; Muhamad, S.; Manaf, M.R.A.; Hamid, M.Z.A.	2013	Malaysia	cross‑sectional	262	Primary health care workers	1	8
247	Knowledge, attitudes and beliefs of health care workers towards influenza vaccination	Occupational Medicine	Mytton, O.T.; O'Moore, E.M.; Sparkes, T.; Baxi, R.; Abid, M.	2013	United Kingdom	cross‑sectional	998	HCWs, Doctor 72/994 (7) Nurse or midwife 301/994 (30) Other qualified and technical staff 100/994 (10) Clinical support staff 216/994 (22) Central NHS support staff 305/994 (31)	1	8	72	301	625
248	Factors influencing uptake of influenza A (H1N1) vaccine amongst healthcare workers in a regional pediatric centre: Lessons for improving vaccination rates	Vaccine	Chen, S.C.; Hawkins, G.; Aspinall, E.; Patel, N.	2012	United Kingdom	cross‑sectional	260	Frontline HCW, categorised as nursing, medical staff, paramedical (PAMS: nursing assistants, physiotherapists, occupational therapists and speech and language therapists), administrative and domestic staff (cleaners, housekeepers and porters)	1	8	73	176	11
249	Innovative approaches for understanding seasonal influenza vaccine declination in healthcare personnel support development of new campaign strategies	Infection Control and Hospital Epidemiology	Schult, T.M.; Awosika, E.R.; Hodgson, M.J.; Hirsch, P.R.; Nichol, K.L.; Dyrenforth, S.R.; Moore, S.C.	2012	United States	cross‑sectional	29834	HCPs,physicians (MDs) and dentists; physician assistants (PAs) and nurse practitioners (NPs); registered nurses (RNs); licensed practical nurses (LPNs) and nursing assistants (NAs); other clinical staff; and nonclinical staff.	1	8	1253	6975	21606
250	Pandemic influenza A (H1N1) 2009 in a critical care and theatre setting: Beliefs and attitudes towards staff vaccination	journal of hospital infection	Parry, H.M.; Damery, S.; Fergusson, A.; Draper, H.; Bion, J.; Low, A.E.	2011	United Kingdom	cross‑sectional	187	HCWs,Anaesthetists 68 operating department practitioners 42 ICU nurses 77	1	6	68	77	42
251	Opinions of employees of the National Institute of Public Health--National Institute of Hygiene in Warsaw on influenza vaccination.	Przegl Epidemiol	Supranowicz, P.; Brydak, L.B.	2013	Poland	cross‑sectional	187	EMPLOYEES OF THE NATIONAL INSTITUTE OF PUBLIC HEALTH – NATIONAL INSTITUTE OF HYGIENE IN WARSAW, POLAND. including: numer of researchers, technicians, administrative staff, 77, 62, 48 respectively.	1	6	0	0	187
252	Attitudes of dental healthcare workers towards the influenza vaccination	International Journal of Hygiene and Environmental Health	Wicker, S.; Rabenau, H.F.; Betz, W.; Lauer, H.C.	2012	Germany	cross‑sectional	242	dental healthcare workers (DHCWs)and dental students	1	6	0	0	242
253	The expected emotional benefits of influenza vaccination strongly affect pre-season intentions and subsequent vaccination among healthcare personnel	vaccine	Thompson, M.G.; Gaglani, M.J.; Naleway, A.; Ball, S.; Henkle, E.M.; Sokolow, L.Z.; Brennan, B.; Zhou, H.; Foster, L.; Black, C.; Kennedy, E.D.; Bozeman, S.; Grohskopf, L.A.; Shay, D.K.	2012	USA	prospective cohort	1544	healthcare personnel	2	10	204	676	664
254	Primary healthcare professionals' knowledge, attitude and behavior regarding influenza immunization; 2006-2007 season adverse effect profile	Bratisl Lek Listy	Mistik, S.; Balci, E.; Elmali, F.	2012	Turkey	cross‑sectional	552	Primary healthcare professionals	1	6	108	87	357
255	The evaluation of the opinions and attitudes of healthcare personnel of the province Diyarbakir against influenza A (H1N1) and the vaccination	Human Vaccines	Sevencan, F.; Ertem, M.; Ã–zÃ§ullu, N.; Dorman, V.; Kubat, N.K.	2011	Turkey	cross‑sectional	1658	healthcare personnel, 12.8% of the participants were general practitioner, 58.3% were working in the primary care.	1	6	269	456	933
256	Knowledge, attitudes and perceptions of health professionals in relation to A/H1N1 influenza and its vaccine	Emerging Health Threats Journal	LÃ³pez-Picado, A.; ApiÃ±aniz, A.; Ramos, A.L.; Miranda-Serrano, E.; Cobos, R.; Parraza-DÃ­ez, N.; Amezua, P.; Martinez-Cengotitabengoa, M.; Aizpuru, F.	2012	Spain	cross-sectional	115	71 (61.7%) are doctors & 44 (38.3%)are nurses	1	8	71	44	0
257	Intention to accept pandemic H1N1 vaccine and the actual vaccination coverage in nurses at a Chinese children's hospital	The Hong Kong Journal of Paediatrics	Hu, S.S.; Yang, L.I.; Chen, S.H.; Wang, X.F.; Han, Y.F.; Zhang, W.F.	2011	China	cross-sectional	278	nurses in the children's hospital	1	8	0	278	0
258	A Patient Safety Issue: Mandatory Influenza Vaccination for Health Care Workers	Procedia in Vaccinology	Wicker, S.; Rabenau, H.F.	2010	Germany	cross-sectional	500	HCWs	1	5
259	Attitudes towards vaccination against seasonal influenza of health-care workers in primary health-care settings in Greece	Vaccine	Dedoukou, X.; Nikolopoulos, G.; Maragos, A.; Giannoulidou, S.; Maltezou, H.C.	2010	Greece	cross-sectional	1617	HCWs, Physicians 559, Nurses 524, Paramedical personnel 135, Technical personnel 240, Administrative personnel 136	1	8	559	524	534
260	Survey of healthcare workers' attitudes, beliefs and willingness to receive the 2009 pandemic influenza a (H1N1) vaccine and the impact of educational campaigns	Annals of the Academy of Medicine, Singapore	Thoon, K.C.; Chong, C.Y.	2010	Singapore	cross-sectional survey was conducted before and after	192	HCWs	1	8	9	47	50
261	Health care worker knowledge, attitudes, and beliefs regarding mandatory influenza vaccination	Archives of pediatrics & adolescent medicine	Douville, L.E.; Myers, A.; Jackson, M.A.; Lantos, J.D.	2010	United states	cross-sectional	574	HCWs, physicians, nurses and other employees	1	6	63	135	376
262	Influenza vaccination; Rates, knowledge and the attitudes of physicians in a university hospital	Turkiye Klinikleri Journal of Medical Sciences	DÃ¶nmez, L.; HÃ¼seyin Polat, H.; Nevzat YalÃ§in, A.; Ã–ncel, S.; Turhan, O.	2010	Turkey	cross-sectional	235		1	6	235	0	0
263	Predisposing, reinforcing, and enabling factors influencing influenza vaccination acceptance among healthcare workers	infection control and hospital epidemiology	Bautista, D.; Vila, B.; UsÃ³, R.; TÃ©llez, M.; ZanÃ³n, V.	2006	Spain	case-control study	432		4	8
264	Influenza vaccination among medical residents in a teaching hospital	infection control and hospital epidemiology	Bishburg, E.; Shah, M.; Mathis, A.S.	2008	United states	cross-sectional	91	medical residents	1	6	91	0	0
265	Attitudes, knowledge and factors related to acceptance of influenza vaccine by pediatric healthcare workers	Journal of Pediatric Infectious Diseases	Livni, G.; Chodik, G.; Yaari, A.; Tirosh, N.; Ashkenazi, S.	2008	Israel	cross-sectional	398	pediatric healthcare workers	1	8	181	217	0
266	Influenza vaccination acceptance among health-care workers: A nationwide survey	Vaccine	Maltezou, H.C.; Maragos, A.; Katerelos, P.; Paisi, A.; Karageorgou, K.; Papadimitriou, T.; Pierroutsakos, I.N.	2008	Greece	cross-sectional	8062	HCWs	1	6	1915	3632	2515
267	U.S. Healthcare Personnel and Influenza Vaccination During the 2004-2005 Vaccine Shortage	The American Journal of Preventive Medicine	Lorick, S.A.; Wortley, P.M.; Lindley, M.C.; Bardenheier, B.H.; Euler, G.L.	2008	United states	Behavioral Risk Factor Surveillance System	4609	healthcare facility workers (HCFW)	1	7
268	Attitudes and knowledge regarding influenza vaccination among hospital health workers caring for women and children	Vaccine	Esposito, S.; Tremolati, E.; Bellasio, M.; Chiarelli, G.; Marchisio, P.; Tiso, B.; Mosca, F.; Pardi, G.; Principi, N.	2007	Italy	cross-sectional	707	HCWs, . Three hun_x0002_dred and forty (48.1%) worked in OB/GYN (128 physicians, 142 nurses, 70 paramedics), 123 (17.4%) in neonatology (33 physicians, 63 nurses, 27 paramedics) and 244 (34.5%) in pediatrics (114 physicians, 98 nurses, 32 paramedics).	1	6	275	303	129
269	Attitudes of internal medicine residents regarding influenza vaccination	Infection Control and Hospital Epidemiology	Nafziger, D.A.; Herwaldt, L.A.	1994	United states	cross-sectional	78	Internal Medicine Residents	1	6	78	0	0
270	Predictors of influenza vaccination amongst Australian nurses.	Australian Journal of Advanced Nursing	Campos, W.; Jalaludin, B.B.	2002	Australia	cross-sectional	232	nurses	1	8	0	232	0
271	Pediatrician-dependent barriers in influenza vaccine administration	The Pediatric Infectious Disease Journal	Serwint, J.	1993	United states	cross-sectional	49	Pediatric faculty	1	6	49	0	0
272	Influenza vaccine: Immunization rates, knowledge, and attitudes of resident physicians in an urban teaching hospital	Infection Control and Hospital Epidemiology	Wodi, A.P.; Samy, S.; Ezeanolue, E.; Lamour, R.; Patel, R.; Budnick, L.D.; Dashefsky, B.	2005	United states	cross-sectional	196	Residents	1	6	196	0	0
273	Knowledge and attitudes among patients with asthma and parents and physicians towards influenza vaccination.	Allergologia et immunopathologia	Kaya A; ; AltÄ±nel N; Karakaya G; Ã‡etinkaya F	2017	Turkey	questionnaire	189	most of whom were paediatricians and pulmonary physicians	1	6	189	0	0
274	The Health Belief Model in predicting healthcare workers' intention for influenza vaccine uptake in Jordan.	Vaccine	Alhalaseh L; ; Fayoumi H; Khalil B	2020	Jordan	cross-sectional questionnaire-based study	477	477	1	6	321		156
275	Factors associated with uptake of pandemic influenza vaccine among general practitioners and practice nurses in Shropshire, UK.	Primary Care Respiratory Journal	Hothersall EJ; ; de Bellis-Ayres S; Jordan R	2012	UK	Cross-sectional	205	Nurses	1	8	108	84	13
276	Pandemic influenza (A/H1N1) vaccine uptake among French private general practitioners: a cross sectional study in 2010.	PLOS ONE	Verger P; ; Flicoteaux R; Schwarzinger M; Sagaon-Teyssier L; Peretti-Watel P; Launay O; Sebbah R; Moatti JP	2012	France	Cross-sectional	1431	GPs	1	8	1431	0	0
277	Attitudes towards influenza vaccination of multi-nationality health-care workers in Saudi Arabia.	Vaccine	Al-Tawfiq JA; ; Antony A; Abed MS	2009	Saudi Arabia	Cross-sectional	244	13% physicians 54.1% nurses 32.8% parmacist, lab, radio, technicians	1	6	32	132	80
278	Determination of factors required to increase uptake of influenza vaccination among hospital-based healthcare workers.	The Journal of hospital infection	Hopman CE; ; Riphagen-Dalhuisen J; Looijmans-van den Akker I; Frijstein G; Van der Geest-Blankert AD; Danhof-Pont MB; De Jager HJ; Bos AA; Smeets E; De Vries MJ; Gallee PM; Lenderink AF; Hak E	2011	Netherlands	cross-sectional	1295	Hospital based HCWs	1	8	154	925	216
279	Uptake rates, knowledge, attitudes, and practices toward seasonal influenza vaccination among healthcare workers in Lebanon.	Human vaccines & immunotherapeutics	Alame M; ; Kaddoura M; Kharroubi S; Ezzeddine F; Hassan G; Diab El-Harakeh M; Al Ariqi L; Abubaker A; Zaraket H	2021	Lebanon	cross-sectional mixed-design survey	429	HCWs	1	8	204	183	42
280	Factors associated with increased healthcare worker influenza vaccination rates: results from a national survey of university hospitals and medical centers.	Infection control and hospital epidemiology	Talbot TR; ; Dellit TH; Hebden J; Sama D; Cuny J	2010	USA	cross-sectional	368696	HCWs	1	6	not mentioned	not mentioned	not mentioned
281	The influenza vaccine for nursing and care professionals at emergency services in Flanders.	Human vaccines & immunotherapeutics	Samyn M; ; Van Hal G; Vandevijvere H; Van Damme P	2021	Belgium	cross-sectional	548	HCWs	1	6	not mentioned	not mentioned	not mentioned
282	Flu Vaccination Attitudes, Behaviours, and Knowledge among Health Workers.	International Journal of Environmental Research and Public Health	Arghittu A; ; Dettori M; Azara A; Gentili D; Serra A; Contu B; Castiglia P	2020	Italy	cross-sectional	457	HCWs	1	8	163	178	116
283	Low rates of influenza vaccination uptake among healthcare workers: Distinguishing barriers between occupational groups.	American Journal of Infection Control	Durovic A; ; Widmer AF; Dangel M; Ulrich A; Battegay M; Tschudin-Sutter S	2020	Switzerland	cross-sectional	1454	HCWs	1	6	285	409	760
284	Prevalence of influenza vaccine hesitancy at a tertiary care hospital in Riyadh, Saudi Arabia.	Journal of Infection and Public Health	Alabbad AA; ; Alsaad AK; Al Shaalan MA; Alola S; Albanyan EA	2018	Saudi Arabia	cross-sectional	100	three groups (parents, adult patients, and healthcare workers [HCWs]) There were 100 participants in each group.	1	6	11	58	31
285	Influenza vaccine acceptance by healthcare workers in Saudi Arabia: A questionnaire-based analysis.	Le infezioni in medicina	Rabaan AA; ; Wyse R; Al-Tawfiq JA; Alahmed SH; Aljeldah MM; Bazzi AM; Asseri AM; Binjomah AZ; Haque S	2020	Saudi Arabia	cross-sectional	633	HCWs	1	6	266	152	215
286	Annual influenza vaccination: coverage and attitudes of primary care staff in Australia.	. Influenza and Other Respiratory Viruses	Ward K; ; Seale H; Zwar N; Leask J; Macintyre CR	2011	Australia	survey	139	79 GPs, 60 nurses	1	6	79	60	0
287	Influenza vaccination attitudes and practices among US registered nurses.	American Journal of Infection Control	Clark SJ; ; Cowan AE; Wortley PM	2009	USA	a cross-sectional survey	1017 nurses		1	6	0	1017	0
288	Knowledge, attitudes and behaviour of hospital health-care workers regarding influenza A/H1N1: a cross sectional survey.	BMC infectious diseases	Albano L; ; Matuozzo A; Marinelli P; Di Giuseppe G	2014	Italy	Cross-sectional	600	HCWs	1	7	154	365	43
289	Knowledge and attitudes on pandemic and seasonal influenza vaccination among Slovenian physicians and dentists.	European Journal of Public Health	SoÄan M; ; ErÄulj V; Lajovic J	2013	Slovenia	Cross-sectional	1718	Physicians and dentists	1	5	1392	279
290	Influenza immunisation: attitudes and beliefs of UK healthcare workers.	Occupational and Environmental Medicine BMJ	Smedley J; ; Poole J; Waclawski E; Stevens A; Harrison J; Watson J; Hayward A; Coggon D	2007	UK	Cross-sectional	6302	HCWs	1	6	1702	1891	2709
291	Knowledge and attitudes on influenza vaccination among Italian physicians specialized in respiratory infections: an Italian Respiratory Society (SIP/IRS) web-based survey.	Journal of Preventive Medicine and Hygiene	Gramegna A; ; Dellafiore S; Contarini M; Blasi F; Aliberti S; Tosatto R; Mantero M	2018	Italy	Cross-sectional	144	Physicians	1	4	144
292	Knowledge, attitudes, beliefs and practices of Occupational Physicians towards seasonal influenza vaccination: a cross-sectional study from North-Eastern Italy.	Journal of Preventive Medicine and Hygiene	RiccÃ² M; ; Cattani S; Casagranda F; Gualerzi G; Signorelli C	2017	Italy	Cross-sectional	92	Occupational physicians	1	8	92
293	Attitudes and perceptions among the pediatric health care providers toward influenza vaccination in Qatar: A cross-sectional study.	Vaccine	Alhammadi A; ; Khalifa M; Abdulrahman H; Almuslemani E; Alhothi A; Janahi M	2015	Qatar	Cross-sectional	230	Pediatric HCPs	1	8	59	92
294	Assessment of the belief and attitudes of Iranian healthcare personnel's toward the influenza infection and influenza vaccination.	Journal of preventive medicine and hygiene	Hosamirudsari H; ; Kanavee AR; Ghanbari M; Akbarpour S; Alimohamadi Y	2019	Iran	cross-sectional	418	HCWs	1	7	42	270	66
295	An assessment of healthcare professionals' knowledge about and attitude towards influenza vaccination in Freetown Sierra Leone: a cross-sectional study.	BMC public health	James PB; ; Rehman IU; Bah AJ; Lahai M; Cole CP; Khan TM	2017	Sierra Leone	Cross-sectional	706	HCWs	1	7	46	425	233
296	Pandemic influenza A/H1N1 vaccination uptake among health care workers in Qatar: motivators and barriers.	Vaccine	Alkuwari MG; ; Aziz NA; Nazzal ZA; Al-Nuaimi SA	2011	Qatar	Cross-sectional	523	HCWs	1	7	203	318
297	Stepwise intervention including 1-on-1 counseling is highly effective in increasing influenza vaccination among health care workers.	American Journal of Infection Control	Jung Y; ; Kwon M; Song J	2017	Republic of Korea	Intervention	1433	HCWs	5	7	276	699	458
298	Improving neglected influenza vaccination among healthcare workers in long-term care.	Journal of Amercian Geriatric Society	Thomas DR; ; Winsted B; Koontz C	1993	USA	Intervention	198	HCWs	5	6	3	98	97
299	Attitudes and practices regarding influenza vaccination among healthcare workers providing services to individuals with spinal cord injuries and disorders.	Infection Control and Hospital Epidemiology	LaVela SL; ; Smith B; Weaver FM; Legro MW; Goldstein B; Nichol K	2004	USA	Cross-sectional	1140	HCWs employed at spinal cord injury centers	1	7		637
300	Seasonal and Pandemic A (H1N1) 2009 influenza vaccination coverage and attitudes among health-care workers in a Spanish University Hospital.	Vaccine	VÃ­rseda S; ; Restrepo MA; Arranz E; MagÃ¡n-Tapia P; FernÃ¡ndez-Ruiz M; de la CÃ¡mara AG; Aguado JM; LÃ³pez-Medrano F	2010	Spain	cross-sectional	527	HCWs	1	5	120	253	154
301	Improving influenza immunization rates among healthcare workers caring for high-risk pediatric patients.	Infection Control and Hospital Epidemiology	Bryant KA; ; Stover B; Cain L; Levine GL; Siegel J; Jarvis WR	2004	USA	Cross-sectional	1123	HCWs	1	4	53	1003	50
302	Influenza vaccination among primary healthcare workers.	Vaccine	Abramson ZH; ; Levi O	2008	Israel	Cross-sectional	275	HCWS	1	5	94	62	119
303	Barriers to seasonal influenza vaccine uptake among health care workers in long-term care facilities: A cross-sectional analysis.	British Journal of Health Psychology	Kenny E; ; McNamara Ã; Noone C; Byrne M	2020	Ireland	Cross-sectional	372	HCWs	1	8	37	132	197
304	Promotion of influenza vaccination among health care workers: findings from a tertiary care children's hospital in Italy.	BMC Public Health	Cozza V; ; Alfonsi V; Rota MC; Paolini V; Ciofi degli Atti ML	2015	Italy	Cross-sectional	191	HCws	1	6	41	109	41
305	Low influenza vaccine uptake by healthcare workers caring for the elderly in South African old age homes and primary healthcare facilities.	Bmc Public Health	Sibanda M; ; Meyer JC; Godman B; Burnett RJ	2023	South africa	Cross-sectional	276	HCWs	1	6	11	224	41
306	Vaccinating health care workers during an influenza pandemic.	Occupational Medicine	Head S; ; Atkin S; Allan K; Ferguson C; Lutchmun S; Cordery R	2012	England	Cross-sctional	221	HCWs	1	4	76	109
307	Attitude of healthcare personnel regarding influenza immunization.	Infection control and hospital epidemiology	Watanakunakorn C; ; Ellis G; Gemmel D	1993	USA	cross-sectional	1203	HCWs	1	4	45	485	655
308	Willingness to accept H1N1 pandemic influenza vaccine: a cross-sectional study of Hong Kong community nurses.	BMC infectious diseases	Wong SY; ; Wong EL; Chor J; Kung K; Chan PK; Wong C; Griffiths SM	2010	Hong Kong	cross-sectional	267	Community nurses	1	8		267
309	Factors influencing uptake of influenza vaccination among hospital-based health care workers.	Occupational medicine (Oxford, England)	Qureshi AM; ; Hughes NJ; Murphy E; Primrose WR	2004	USA	cross-sectional	551	HCWs	1	5	36	302	206
310	Promotion of flu vaccination among healthcare workers in an Italian academic hospital: An experience with tailored web tools.	Human vaccines & immunotherapeutics	Conte A; ; Quattrin R; Filiputti E; Cocconi R; Arnoldo L; Tricarico P; Delendi M; Brusaferro S	2016	Italy	Intervention	417	HCWs	5	6	120	199	98
311	A successful mandatory influenza vaccination campaign using an innovative electronic tracking system.	Infection control and hospital epidemiology	Palmore TN; ; Vandersluis JP; Morris J; Michelin A; Ruprecht LM; Schmitt JM; Henderson DK	2009	USA	Campaign	2754	HCWs (NIH employees)	5	7
312	Influenza vaccination among healthcare workers.	Israel Medical Association Journal	Habib S; ; Rishpon S; Rubin L	2000	Israel	cross sectional	670	HCWs	1	6	43	70	78
313	Co-ordinated approach to healthcare worker influenza vaccination in an area health service.	Journal of Hospital Infection	Ballestas T; ; McEvoy SP; Doyle J	2009	Australia	The objectives were addressed using two methods: (1) an area-wide HCW influenza vaccination programme including a standardised data collection protocol; (2) a cross-sectional survey. I extracted the results of the survey only because the capmaign data contains students.	222	Doctors and Nurses	5	5	21	201
314	Decreased influenza vaccination coverage among Chinese healthcare workers during the COVID-19 pandemic.	Infectious Disease of Poverty	Ma L; ; Han X; Ma Y; Yang Y; Xu Y; Liu D; Yang W; Feng L	2022	China	Cross-sectional	1697	HCWs	1	7	1023	438	236
315	Voluntary to mandatory: evolution of strategies and attitudes toward influenza vaccination of healthcare personnel.	Infection Control and Hospital Epidemiology	Quan K; ; Tehrani DM; Dickey L; Spiritus E; Hizon D; Heck K; Samuelson P; Kornhauser E; Zeitany R; Mancia S; Thrupp L; Tiso SM; Huang SS	2012	USA	Retrospective cohort study over 5 years	6414	HCWs	2	10
316	Influenza vaccination: healthcare workers attitude in three Middle East countries.	International Journal of Medical Sciences	Abu-Gharbieh E; ; Fahmy S; Rasool BA; Khan S	2010	United Arab Emirates (UAE), Kuwait and Oman	Cross-sectional	993	HCWs	1	6
317	Influenza vaccination among healthcare workers: ten-year experience of a large healthcare organization.	Infection Control and Hospital Epidemiology	Ajenjo MC; ; Woeltje KF; Babcock HM; Gemeinhart N; Jones M; Fraser VJ	2010	USA	Descroptive retrospective		HCWs	2	5
318	Motivators and barriers to vaccination of health professionals against seasonal influenza in primary healthcare.	BMC Health Services Research	Petek D; ; Kamnik-Jug K	2018	Solvenia	Cross-sectional	263	HCWs	1	6	44	129	77
319	Knowledge, Attitude, Practice and Barriers Associated with Influenza Vaccination among Health Care Professionals Working at Tertiary Care Hospitals in Lahore, Pakistan: A Multicenter Analytical Cross-Sectional Study	Vaccines MDPI	Umbreen, G.; Rehman, A.; Avais, M.; Jabeen, C.; Sadiq, S.; Maqsood, R.; Rashid, H.B.; Afzal, S.; Webby, R.J.; Chaudhry, M.	2023	Pakistan	Cross-sectional	400	HCWs	1	6	230	166	4
320	Vaccinating Front-Line Healthcare Workers: Results of a Pre-Pandemic Cross-Sectional Study from North-Eastern Italy on First Responders	Vaccines MDPI	RiccÃ², M.; Vezzosi, L.; Marchesi, F.	2022	Italy	Cross-sectional	161	HCWs	1	8			161
321	Attitudes of Healthcare Workers toward Influenza Vaccination in the COVID-19 Era	Vaccines MDPI	Sani, T.; Morelli, I.; Sarti, D.; Tassinari, G.; Capalbo, M.; Espinosa, E.; Gasperini, B.; Prospero, E.	2022	Italy	Retrospective observational	324	HCWs	2	7	99	133	90
322	Healthcare workers' duty concerns of working in the isolation ward during the novel H1N1 pandemic.	Jornal of Clinical Nursing	Wong, Eliza LY; Wong, Samuel YS; Lee, Nelson; Cheung, Annie; Griffiths, Sian	2012	Hong Kong	Qualitative (face to face interviews)	10		3	9	4	3	3
323	Changing attitudes towards annual influenza vaccination amongst staff in a Tertiary Care Irish University Hospital	Irish journal of medical science	Kearns, EC; Callanan, I; O'Reilly, A; Purcell, A; Tuohy, N; Bulfin, S; Smyth, A; Bairead, E; Fitzgerald, S; Feeney, E; Waqas, S	2022	Ireland	cross-sectional	728	hospital staff	1	4	146	144	425
324	Evaluating the knowledge, attitudes, and uptake of the influenza vaccine in healthcare professionals: A cross-sectional study from the United Arab Emirates	Pharmacy practice	Barqawi, H; Saddik, B; Adra, S; Soudan, H; Mustafa, J; Nidal, A; Abu-Gharbieh, E	2021	UAE	cross-sectional study	417	HCPs	1	8
325	Influenza immunization rates, knowledge, attitudes and practices of health care workers in Iran	Journal of infection in developing countries	Khazaeipour, Z; Ranjbarnovin, N; Hoseini, N	2010	Iran	cross-sectional	144	HCWs	1	8	25	25	89
326	BARRIERS TO INFLUENZA VACCINE ACCEPTANCE - A SURVEY OF PHYSICIANS AND NURSES	American Journal of Infection Control	WEINGARTEN, S; RIEDINGER, M; BOLTON, LB; MILES, P; AULT, M	1989	Los Angeles, US	cross sectional	193	physicians and nurses	1	4	85	108
327	A survey of the delivery and uptake of influenza vaccine among health care workers	Occupational medicine (Oxford, England)	Smedley, J; Palmer, C; Baird, J; Barker, M	2002	UK	pre -post questionnaire	290	doctors and nurses	5	8
328	Influenza Vaccination Hesitancy among Healthcare Workers in South Al Batinah Governorate in Oman: A Cross-Sectional Study	Vaccines	Al Vwaidy, ST; Al Mayahi, ZK; Kaddoura, M; Mahomed, O; Lahoud, N; Abubakar, A; Zaraket, H	2020	oman	cross sectional	390	HCWs	1	5	108	173	109
329	Flu Vaccination among Healthcare Professionals in Times of COVID-19: Knowledge, Attitudes, and Behavior	Vaccines	Colaprico, C; Ricci, E; Bongiovanni, A; Imeshtari, V; Barletta, VI; Manai, MV; Shaholli, D; Marte, M; Serruto, P; La Torre, G	2022	Italy	cross sectional	872	HCWs	1	7	446	232	194
330	Attitudes of healthcare workers to influenza vaccination	Infection, Disease & Health	Knowler, P.; Barrett, M.; Watson, D.A.R.	2018	Australia	cross-sectional	327	HCWs,including doctors, nurses, allied health workers and wardsmen.	1	6	147	124	56
331	Influenza vaccination attitudes of health care workers in Iran	International Journal Of Pharmacy & Technology	Palizi, F.; Mehrdad, R.; Izadi, N.	2016	Iran	cross-sectional	412	HCWs	1	6
332	Improving influenza vaccination rates of healthcare workers: a multipronged approach in Qatar.	Eastern Mediterranean Health Journal	Mustafa M; ; Al-Khal A; Al Maslamani M; Al Soub H	2017	Qatar	campaign	8365	HCWs	5	6	566	1645	6154
333	Knowledge and attitudes towards influenza vaccination of health care workers in emergency services.	Elsevier-vaccine	Hulo S; ; Nuvoli A; Sobaszek A; Salembier-Trichard A	2017	French	self administered questionnaire	344	HCWs	1	7	184	90	70
334	Knowledge of and attitudes to influenza in unvaccinated primary care physicians and nurses.	Human Vaccines & Immunotherapeutics	DomÃ­nguez A; ; Godoy P; Castilla J; MarÃ­a Mayoral J; Soldevila N; Torner N; Toledo D; Astray J; Tamames S; GarcÃ­a-GutiÃ©rrez S; GonzÃ¡lez-Candelas F; MartÃ­n V; DÃ­az J	2014	Spain	cross-sectional study	1965		1	6
335	Preventing Respiratory Viral Transmission in Long-Term Care: Knowledge, Attitudes, and Practices of Healthcare Personnel.	Infect Control Hosp Epidemiol.	O'Neil CA; ; Kim L; Prill MM; Stone ND; Garg S; Talbot HK; Babcock HM	2017	Missouri	Cross-sectional	73	HCWs	1	6	0	22	51
336	Influenza and hepatitis B vaccine acceptance: a survey of health care workers.	American Journal of Infection Control	`	1991	USA	Cross-sectional	240	HCWs	1	6
337	Influenza vaccination coverage among medical residents: an Italian multicenter survey.	Human Vaccines & Immunotherapeutics	Costantino C; ; Mazzucco W; Azzolini E; Baldini C; Bergomi M; Biafiore AD; Bianco M; Borsari L; Cacciari P; Cadeddu C; Camia P; Carluccio E; Conti A; De Waure C; Di Gregori V; Fabiani L; Fallico R; Filisetti B; Flacco ME; Franco E; Furnari R; Galis V; Gallea MR; Gallone MF; Gallone S; Gelatti U; Gilardi F; Giuliani AR; Grillo OC; Lanati N; Mascaretti S; Mattei A; MicÃ² R; Morciano L; Nante N; Nap…	2014	Italy	Cross-sectional	2506	medical residents	1	8	2506	0	0
338	Potential influence of seasonal influenza vaccination requirement versus traditional vaccine promotion strategies on unvaccinated healthcare personnel.	Vaccine	Thompson MG; ; McIntyre AF; Naleway AL; Black C; Kennedy ED; Ball S; Walker DK; Henkle EM; Gaglani MJ	2013	USA	Cross-sectional	1670	HCWs	1	8	211	686	773
339	Impact of the flu mask regulation on health care personnel influenza vaccine acceptance rates.	American Journal of Infection Control	Edwards F; ; Masick KD; Armellino D	2016	USA	cross-sectional	1905	HCWs	1	5
340	Influenza vaccine hesitancy among healthcare workers in Spain: Results of a survey	Vacunas (English Edition)	LucerÃ³n, C.O.; SÃ¡nchez, A.L.; de la Fuente SÃ¡nchez, M.; Galindo Moreno, E.	2022	spain	Cross-sectional	11108	HCWs	1	7	3365	3773	3970
341	Influenza vaccination knowledge and perceptions among Veterans Affairs nurses.	American Journal of Infection Control	Jennings AR; ; Burant CJ	2013	USA	Cross-sectional	203	Nuses	1	6	0	203	0
342	Low acceptance of vaccination against the 2009 pandemic influenza A(H1N1) among healthcare workers in Greece.	Eurosurveillance	Rachiotis G; ; Mouchtouri VA; Kremastinou J; Gourgoulianis K; Hadjichristodoulou C	2010	Greece	Cross-sectional	441	HCWs	1	6	215	169	57
343	Facilitators for influenza vaccination uptake in nurses at the Shiraz University of Medical Sciences.	Public Health	Askarian M; ; Khazaeipour Z; McLaws ML	2011	Iran	Cross-sectional	167	Nurses	1	6	0	167	0
344	Acceptability of live attenuated influenza vaccine by vaccine providers in Quebec, Canada.	Human Vaccines and Immunotherapeutics	DubÃ© E; ; Gagnon D; Kiely M; Boulianne N; Landry M	2015	Canada	Cross-sectional	314	Nurses	1	6	6	296	12
345	Exploring vaccine hesitancy among healthcare providers in the United Arab Emirates: a qualitative study	Human Vaccines and Immunotherapeutics	Elbarazi, I; Al-Hamad, S; Alfalasi, S; Aldhaheri, R; Dube, E; Alsuwaidi, AR	2021	UAE	qualitative - semi-structured	33	HCPs	3	9	14	11	8
346	What is the Impact of the ‘Flu Mask’ Regulation on Healthcare Personnel Influenza Vaccine Acceptance Rates?	American Journal of Infection Control	Edwards, Frances; Armellino, Donna	2015	NYC, US	cross sectional	1905	HCWs	1	5
347	Healthcare professionals' knowledge, attitude and acceptance of influenza vaccination in Saudi Arabia: a multicenter cross-sectional study.	BMC Health Services Research	Alshammari TM; ; Yusuff KB; Aziz MM; Subaie GM	2019	Saudi Arabia	multicenter cross-sectional study	364	(61.8%) of participants were female. Regarding profession, the majority (60.4%) of the participants were nurses followed by physicians and pharmacists (14.8 and 12.6%, respectively	1	6	54	220	90
348	Why health care workers decline influenza vaccination.	official journal of the American Association of Occupational Health Nurses	Moore BS;	2009	USA	retrospective survey study	8537	HCWs	1	4
349	Reasons for and barriers to influenza vaccination among healthcare workers in an Australian emergency department	AUSTRALIAN JOURNAL OF ADVANCED NURSING	Osman, AD	2010	Australia	cross sectional	63	ED staff	1	7	12	39	12
350	Achieving and sustaining high rates of influenza immunization among long-term care staff.	Journal of the American Medical Directors Association	Nace DA; ; Hoffman EL; Resnick NM; Handler SM	2007	USA	cross-sectional	236	HCWs	1	7	0	59	177
351	Barriers and drivers to adult vaccination among family physicians - Insights for tailoring the immunization program in Germany.	Vaccine	Neufeind J; ; Betsch C; Habersaat KB; Eckardt M; Schmid P; Wichmann O	2020	Germany	survey	735		1	8	735	0	0
352	The decision to receive influenza vaccination among nurses in North and South Dakota.	Public Health Nursing	Johansen LJ; ; Stenvig T; Wey H	2012	USA	descriptive correlational survey	193		1	8	0	193	0
353	Knowledge, attitudes, and practice of healthcare workers toward influenza vaccination at Al Jalila Children's Specialty Hospital (AJCH), Dubai, UAE	International Journal of Pediatrics and Adolescent Medicine	Abu Hammour, W.; Al-Saleh, S.	2019	UAE	cross-sectional	263	physicians, nurses, healthcare assistants, and nonhealthcare workers	1	6	31	89	47
354	Barriers of influenza vaccination in health care personnel in France.	American Journal of Infection Control	Kadi Z; ; Atif ML; Brenet A; Izoard S; Astagneau P	2016	France	cross-sectional	3213	HCWs	1	5	132	1829	1128
355	Implementation of a Mandatory Influenza Vaccine Policy: A 10-Year Experience.	Clinical Infectious Diseases	Kitt E; ; Burt S; Price SM; Satchell L; Offit PA; Sammons JS; Coffin SE	2021	USA	observational study	CHOP (Children’s Hospital of Philadelphia) is a quaternary care pediatric healthcare network that includes a 565-bed hospital situated in West Philadelphia, 31 primary care practices, 17 specialty care clinics, and 3 ambulatory surgical facilities. Approximately 10 000 HCWs are currently employed across all of the CHOP sites.	HCWs	1	6
356	High vaccination rates for seasonal and pandemic (A/H1N1) influenza among healthcare workers in Dutch general practice.	Vaccine	Opstelten W; ; van Essen GA; Heijnen ML; Ballieux MJ; Goudswaard AN	2010	Netherlands	Cross-sectional	670	GPs	1	7	670	0	0
357	Planning and process evaluation of a multi-faceted influenza vaccination implementation strategy for health care workers in acute health care settings.	BMC infectious diseases	Riphagen-Dalhuisen J; ; Frijstein G; van der Geest-Blankert N; Danhof-Pont M; de Jager H; Bos N; Smeets E; de Vries M; Gallee P; Hak E	2013	Netherlands	Intervention	[Intervention UMCs n = 249 HCWs 2009/2010 Intervention UMCs 2010/2011 n = 303 HCWs ] [this is just the number for HCWs that used and appreciated the methods/material and particpate in quntitative evlauation]	HCWs	4	10
358	Impact of vaccinating HCWs on the ward and possible influence of avian flu threat.	Infection	Chittaro M; ; Turello D; Calligaris L; Farneti F; Faruzzo A; Fiappo E; Panariti M; Brusaferro S	2009	Italy	Cohort	473	HCWs	2	9	106	254	113
359	Seasonal Influenza Vaccination in Health Care Workers. A Pre-Post Intervention Study in an Italian Paediatric Hospital.	International journal of environmental research and public health	Gilardi F; ; Castelli Gattinara G; Vinci MR; Ciofi Degli Atti M; Santilli V; Brugaletta R; Santoro A; Montanaro R; Lavorato L; Raponi M; Zaffina S	2018	Italy	Intervention	2123	HCWs	5	7	517	1080	526
360	A(H1N1) pandemic influenza and its prevention by vaccination: paediatricians' opinions before and after the beginning of the vaccination campaign.	Bmc Public Health	DubÃ© E; ; Fannie D; Vladimir G; Julie BA; Chantal S; France L; FranÃ§ois BD; Shelly M; Ian G; Nicole B	2011	Canada	Cross-sectional before and after a campaign	911	Pediatricians	5	6	911	0	0
361	Factors Associated With Emergency Medical Services Providers' Acceptance of the Seasonal Influenza Vaccine	Disaster medicine and public health preparedness	Rosenblum, AJ; Wend, CM; Huang, RH; Spangler, S; Barnett, DJ; Levy, MJ	2022	Virginia , US	cross sectional	2796	EMS clinicians	1	8	0	0	2796
362	How has COVID-19 pandemic changed flu vaccination attitudes among an Italian cancer center healthcare workers?	Human vaccines & immunotherapeutics	Bertoni L; ; Roncadori A; Gentili N; Danesi V; Massa I; Nanni O; Altini M; Gabutti G; Montella MT	2022	Italy	retrospective	381	HCWs	1	6	75	57	249
363	Trends, uptake, and predictors of influenza vaccination among healthcare practitioners during the covid-19 pandemic flu season (2020) and the following season (2021) in saudi arabia	Journal of multidisciplinary healthcare	Alkathlan, M.; Khalil, R.; Alhemaidani, M.F.; Alaed, G.H.; Almutairi, S.M.; Almalki, H.A.; Alghofaili, R.H.; Al-Wutayd, O.	2021	Saudi Arabia	Cross-sectional	424	physicians and nurses	1	7	118	306	0
364	Beliefs on mandatory influenza vaccination of health care workers in nursing homes: a questionnaire study from the Netherlands.	Journal of the American Geriatrics Society	Looijmans-van den Akker I; ; Marsaoui B; Hak E; van Delden JJ	2009	Netherlands	cross-sectional	185	HCWs	1	5
365	Support for seasonal influenza vaccination requirements among US healthcare personnel.	Infection Control and Hospital Epidemiology	Maurer J; ; Harris KM; Black CL; Euler GL	2012	USA	Cross-sectional	1664	HCWs	1	6	113	447	1104
366	Trust and the demand for autonomy may explain the low rates of immunizations among nurses.	Human Vaccines & Immunotherapeutics	Baron-Epel O; ; Madjar B; Grefat R; Rishpon S	2013	Israel	Cross-sectional	107	Nurses	1	6	0	107	0
367	Attitudes towards influenza and uptake of the flu vaccine: A survey of pharmacy staff working in English hospitals	Vaccine	Hamilton, R.A.; Krockow, E.M.; Vekria, P.	2021	England	cross sectional	170	community pharmacists	1	8	0	0	170
368	Results of a national survey of infectious diseases specialists regarding influenza vaccination programs for healthcare workers.	Infection Control and Hospital Epidemiology	Polgreen PM; ; Septimus E; Talbot TR; Beekmann SE; Helms C	2010	USA	Cross-sectional	668	HCWs	1	6	668	0	0

## Sheet: QA tools
	Q tool no	tool
	1	Analytical_Cross_Sectional_Studies
	2	cohort
	3	qulaitative
	4	RCT
	5	Quasi
